# Marine community metabolomes carry fingerprints of phytoplankton community composition

Katherine R. Heal<sup>a</sup>, Bryndan Durham,<sup>b,c</sup> Angela K. Boysen,<sup>a</sup> Laura T. Carlson,<sup>a</sup> Wei Qin,<sup>a,d</sup> François Ribalet,<sup>a</sup> Angelicque E. White,<sup>e,f</sup> Randelle M. Bundy,<sup>a</sup> E. Virginia Armbrust,<sup>a</sup> Anitra Eiding Ingalls,<sup>a,\*</sup>

School of Oceanography, University of Washington, Seattle, WA<sup>a</sup>; Department of Biology, University of Florida, Gainesville, FL<sup>b</sup>; Department of Biology, Genetics Institute, University of Florida, Gainesville, FL<sup>c</sup>; Department of Microbiology and Plant Biology, University of Oklahoma, Norman, OK<sup>d</sup>; Department of Oceanography, University of Hawaii at Manoa, Honolulu HI<sup>e</sup>; Daniel K. Inouye Center for Microbial Oceanography: Research and Education, Honolulu, HI<sup>f</sup>

Compiled December 20, 2020

This is a draft manuscript, pre-submission

Address correspondence to Anitra E. Ingalls, [aingalls@uw.edu](mailto:aingalls@uw.edu).

## ABSTRACT

Phytoplankton transform inorganic carbon into thousands of biomolecules that represent an important pool of fixed carbon, nitrogen, and sulfur in the surface ocean. Metabolite production differs between phytoplankton, and the flux of these molecules through the microbial food web depends on compound-specific bioavailability to members of a wider microbial community. Yet relatively little is known about the diversity or concentration of metabolites within marine plankton. Here we compare 313 polar metabolites in 21 cultured phytoplankton species and in natural planktonic communities across environmental gradients to show that bulk community metabolomes reflect chemical composition of the phytoplankton community. We also show that groups of compounds have similar patterns across space and taxonomy suggesting that the concentrations of these compounds in the environment are controlled by similar sources and sinks. We quantify several compounds in the surface ocean that represent substantial understudied pools of labile carbon. For example, the N-containing metabolite homarine was up to 3% of particulate carbon and is produced in high concentrations by cultured *Synechococcus*, and S-containing gonyol accumulated up to 2.5 nM in surface particles and likely originates from dinoflagellates. Our results show that phytoplankton composition directly shapes the carbon composition of the surface ocean. Our findings suggest that in order to access these pools of bioavailable carbon, the wider microbial community must be adapted to phytoplankton community composition.

## IMPORTANCE

Microscopic phytoplankton transform 100 million tons of inorganic carbon into thousands of different organic compounds each day. The structure of each chemical is critical to its biological and ecosystem function, yet, the diversity of biomolecules produced by marine microbial communities remained mainly unexplored, especially small polar molecules which are often considered the currency of the microbial loop. Here we explore the abundance and diversity of small biomolecules in planktonic communities across ecological gradients in the North Pacific and within 21 cultured phytoplankton species. Our work demonstrates that phytoplankton diversity is an important determinant of the chemical composition of the highly bioavailable pool of organic carbon in the ocean, and we highlight understudied yet abundant compounds in

Heal et al.

both the environment and cultured organisms. These findings add to understanding of how the chemical makeup of phytoplankton shapes marine microbial communities where the ability to sense and use biomolecules depends on the chemical structure.

**KEYWORDS:** phytoplankton, metabolomics, North Pacific, HILIC, homarine, trigonelline, gonyol

## INTRODUCTION

In the ocean, the molecular makeup of organic carbon shapes its journey through the global carbon cycle. Phytoplankton fix approximately 100 million tons of carbon on a daily basis (1), roughly equivalent to half the total biomass of humans on earth (2). Each day, the microbial community respire about half of this carbon through the microbial loop (3). Approaches analyzing gene expression suggest freshly fixed small biomolecules, or metabolites, are among the most bioavailable in the surface ocean and represent a substantial conduit of carbon and energy flux. Much of the chemical complexity in phytoplankton-derived organic matter remains poorly described both qualitatively and quantitatively, particularly the highly labile portion of organic matter encompassing small polar metabolites. Here we characterize the small molecules within particulate organic matter in natural marine microbial communities in the North Pacific and cultures of 21 phytoplankton species to show that the chemical character of the bulk carbon pool in the ocean reflects the taxonomy of the primary producers present.

Small polar metabolites can be major carbon, nutrient, and/or energy sources for heterotrophs (4, 5) and are often considered the currency of the microbial loop in the ocean. Beyond this, they can maintain phytoplankton-bacterial interactions (6, 7), serve as micronutrients (8, 9, 10), manage redox stress (11), fuel nitrogen fixation (12), act as chemical defenses (13, 14), and more. The comprehensive analysis of the metabolites in a system (metabolomics) is a nascent field and analytically challenging in environmental settings (15, 16, 17). Metabolomic studies are being used to investigate physiological changes in marine organisms under laboratory conditions (4, 18, 19, 20, 21), though the same techniques have not been widely applied to whole communities in natural environments. Existing community marine metabolomic studies have employed targeted approaches in which the compounds detected are chosen by the analyst (5, 12, 21, 22, 23) or the analytical techniques employed preclude the observation of small, highly polar compounds (24, 25).

The chemical makeup of small polar compounds in freshly fixed organic matter influences the flux of carbon and energy through the microbial loop in the surface ocean. Here, we determine the metabolite pools in natural marine communities across space to explore the distributions of both known and unknown compounds. We compare our field observations to metabolomes of cultured marine primary producers from a broad taxonomic range and show how primary producers play an active role in shaping the chemical environment of the surface ocean. Finally, we highlight small polar compounds that may serve as potentially significant conduits of energy and nutrients in marine systems.

## RESULTS AND DISCUSSION

**Patterns of metabolites across space and taxonomy.** We explored the patterns of metabolite abundances in three sample sets of marine particles in the North Pacific Ocean: one surface meridional transect and two depth profiles (Figure 1A, Table S1).

## Community metabolomics

90 In the transect sample set, seven general patterns emerged across latitude using a  
91 *k*-medoids clustering approach of 313 metabolites (Figure 1B). The most common pat-  
92 tern (40% of compounds) showed a modest yet robust increase in concentration with  
93 latitude ('mode *a*' in Figure 1B). This is likely related to the general increase in biomass  
94 with latitude (Figure S1 and as seen in the increase of chlorophyll in Figure 1A). Many  
95 compounds (30%) had their highest concentration in samples from 33 or 34°N (Figure  
96 1B, 'modes *c-f*'). About 19% of metabolites did not have a clear pattern with latitude  
97 (Figure 1B, 'mode *b*'), while 8% of the compounds were generally more abundant in  
98 the southern samples than the northern samples (Figure 1B, 'mode *g*').

99 In a non-metric multidimensional scaling (NMDS) analysis where each metabolite  
100 was treated with equal weight, there was a distinct shift in metabolite patterns in the  
101 samples on either side of approximately 30°N (Figure S2, ANOSIM stat = 0.316, *p* =  
102 0.005). This corresponds well with the southern boundary of the North Pacific Transi-  
103 tion Zone, a well described oceanographic feature which extends from Japan to North  
104 America and arises from large-scale ocean circulation (26, 27). The northern and south-  
105 ern edges of this transition zone comprise of rapid changes in thermohaline struc-  
106 ture and biological species composition (28, 26, 29). We saw a similar stark transition  
107 within the metabolite pools that reiterate the transition from the warm, oligotrophic,  
108 North Pacific Subtropical Gyre (NPSG) into the colder, more nutrient replete North  
109 Pacific Transition Zone (NPTZ) where chlorophyll concentrations, *Synechococcus*, and  
110 picoeukaryote assemblages flourish (Figures 1 and S3, Table S2 for oceanographic con-  
111 ditions). Interestingly, the difference between metabolite profiles within the northern  
112 samples encompasses a much wider range in multivariate space, even within samples  
113 collected at the same time and location (biological replicates, Figure S2). This suggests  
114 the NPTZ is more heterogeneous in its metabolite profiles than the NPSG, and is sup-  
115 ported by the observed high variability in particulate carbon (PC) at northern sampling  
116 sites (Figure S1).

117 We performed the same clustering technique (*k*-medoids) on the same metabo-  
118 lites (when observed) within two depth profiles: one from the NPSG and one from the  
119 NPTZ (Figure 1A for locations). Most of the metabolite concentrations decreased with  
120 depth, again corresponding with a decrease of PC (Figure 1C 'modes *a-f*' and Figure 1D  
121 'modes *a-c*'). The extent of decrease in concentrations varied among metabolites, ex-  
122 emplified in the NPTZ depth profile by comparing the sharply attenuating 'mode *c*' to  
123 the more gentle attenuation of 'mode *a*' (Figure 1C). Modes *a* in both NPTZ and NPSG  
124 depth profiles follow the PC pattern closely, but the other modes do not follow the  
125 same trend as bulk PC with depth (Figure 1C and D). A minority of compounds in both  
126 of these depth profiles either had a subsurface maximum or no clear relationship with  
127 depth (Figure 1C 'mode *g*' and Figure 1D 'mode *d*').

128 Using the 313 metabolites from the transect sample set as a template, we searched  
129 for the same compounds within metabolomes of 21 species of axenic phytoplankton  
130 grown under controlled conditions and analyzed on the same instrumental set up (5)  
131 (Tables S3 and S7). Phytoplankton are the primary source of fixed carbon to the sur-  
132 face ocean and our cultures were grown under conditions that support autotrophic  
133 growth so we could interrogate the metabolite pools these organisms produce *de*  
134 *novo* from inorganic components. The cultures explored here encompass a wide tax-  
135 onomic range from picocyanobacteria that dominate much of our transect (Figure S3)  
136 to members of ubiquitous eukaryotic phytoplankton lineages like diatoms and coccol-  
137 ithophores. The taxonomic groups were recapitulated after a multivariate analysis of  
138 the metabolites across this data set in a semi-quantitative manner, using both NMDS  
139 (Figure S4) and *k*-medoids clustering (Figure 2A).

Heal et al.

140 Overall, we saw that 17% (52) of the 313 metabolites were present in most of  
141 the cultured organisms with 44 of the metabolites within this mode observed in over  
142 80% of the phytoplankton species ('mode *a'* in Figure 2A). This suggests a set of com-  
143 pounds observable in most phytoplankton when analyzed under our analytical condi-  
144 tions. We were able to identify most of these compounds (33/52, 64%) which include  
145 many amino acids, primary metabolites, and nucleic acids (Tables S5 and S6). The re-  
146 maining 36% of compounds within this mode could not be identified, demonstrating  
147 that even the compounds critical to the physiology and biochemistry of a broad swath  
148 of marine primary producers in natural systems remain elusive. Another 39% (123) of  
149 metabolites were seen primarily in subsets of organisms, separating into five modes  
150 ('modes *b-f'* in Figure 2A). Finally, about 44% of the 313 metabolites were either rarely  
151 or never observed in our cultures (mode *g* and *not observed* in Figure 2A).

152 The patterns of metabolites across the cultures suggest suites of compounds that  
153 are closely associated with taxonomic groups of organisms. Several identified metab-  
154 olites in these groups corroborate previous work showing that certain types of organ-  
155 isms produce high concentrations of particular small molecules. For instance, DHPS  
156 and isethionate are within the mode of metabolites associated with diatoms ('mode  
157 *d'*) (5, 7), taurine is associated with dinoflagellates and haptophytes ('mode *f'*) (5), and  
158 glucosylglycerol is associated with cyanobacteria ('mode *c'*) (30) (Figure 2A, Table S6).  
159 Most of the taxon-associated metabolites (72% of metabolites in modes *b-f'* in Fig-  
160 ure 2A) are still unidentified and offer possible future taxon-specific biomarkers in the  
161 polar organic carbon pools.

162 **Primary producers leave a metabolite signature in the environment.** Com-  
163 pounds with similar patterns across these data sets would suggest shared sources  
164 and sinks. To assess this, we tested whether each *k*-medoids derived mode (within  
165 each sample set) was enriched in metabolites from a given mode from a different  
166 sample set, beyond what would be expected with a random assignment (assessed by  
167 a Monte Carlo-based bootstrapping approach, *p*-value < 0.05). For example, of the 52  
168 metabolites that were observed in most of our cultured phytoplankton ('mode *a'* in Fig-  
169 ure 2A), there was a robust enrichment of compounds from the meridional transect  
170 'mode *a'* (in Figure 2C, general increase with latitude, *p* < 0.01, Figure 2B). This may  
171 reflect a general increase in phytoplankton biomass with latitude as supported by the  
172 increase in PC and chlorophyll (Figures S1 and 1A).

173 We capitalized on our results to search for enrichment between each mode in  
174 each sample set and visualized enriched connections among all sample sets in a net-  
175 work analysis where each connection is a statistically significant enrichment between  
176 two modes (*p* < 0.05, Figure 3). This analysis revealed a few *meta-clusters*, or groups of  
177 compounds that have similar patterns as each other across different spatial and taxo-  
178 nomic ranges (Figure 3). These meta-clusters suggest compounds have similar sources  
179 across taxonomy that persist across both latitudinal and depth gradients in the envi-  
180 ronment. Building on the observation of over enrichment of metabolites between  
181 transect data set 'mode *a'* and culture data set 'mode *a'*, we also saw that these modes  
182 share metabolites well beyond random assignment with the modes of metabolites in  
183 both depth profiles that attenuated in close proportion to PC with depth ('modes *a'*  
184 and *b* NPTZ depth profile, 'mode *a'* in NPSG depth profile, *p* < 0.05, Figure 3). Identifi-  
185 ed compounds within this 'core metabolome' meta-cluster included the amino acid  
186 glutamic acid, the nucleoside adenosine, the amino acid precursor homoserine, and  
187 several other primary metabolites (Table S6).

188 Beyond the 'core metabolome', 77% of the 30 compounds associated tightly with  
189 diatoms ('mode *d'* in Figure 2A) were also over-represented within the group of com-

## Community metabolomics

190 pounds with a general increase with latitude ( $p < 0.01$ , Figure 2B). This pattern corre-  
191 sponded with an increase in fucoxanthin, a diatom biomarker observed to be increas-  
192 ing with latitude in a separate analysis from the same sampling period (Figure S6).  
193 The diatom-associated metabolites were also over-represented in the medium atten-  
194 uating metabolites from the NPTZ depth profiles ('mode  $b'$ ' in Figure 1C and 3). DHPS  
195 (a probable osmolyte produced in high concentrations by diatoms (5, 21)) and glycerophosphocholine (a headgroup of phosphatidylcholine lipids commonly produced  
196 by eukaryotic phytoplankton in marine systems (31)) sat within this pattern space as  
197 did 11 other unidentified compounds (Table S6).  
198

199 Surprisingly, compounds tightly associated with dinoflagellates ('mode  $e'$ ' in Fig-  
200 ure 2A) showed a significant over-representation with an environmental distribution  
201 showing a distinct increase in concentration at 34.5°N (Figure 2). Metabolites display-  
202 ing these patterns were over-represented in the sharply attenuating modes in the two  
203 depth profiles (dinoflagellate-associated meta-cluster in Figure 3), in contrast to the  
204 metabolites found associated with diatoms. None of the compounds that reside in  
205 this interaction space could be identified, leaving room for future work to identify and  
206 leverage these compounds as possible biomarkers for dinoflagellates that are easily  
207 observable in the environment.

208 Many of the compounds observed in our environmental samples but not observed  
209 in our culture dataset ('not observed' in Figure 2A) were over-represented by com-  
210 pounds that were more abundant in the NPSG than the NPTZ in the transect ('mode  $g'$   
211 in Figure 2C) or increased with depth in the two depth profiles (rare metabolites meta-  
212 cluster in Figure 3). We only analyzed phytoplankton in our initial analysis; therefore it  
213 is likely that a subset of these compounds were produced *de novo* by organisms we did  
214 not survey. For instance, the compound  $\beta$ -glutamic acid was found to be more abun-  
215 dant at depth than in the surface waters in both of our depth profiles, in contrast to  
216 the majority of compounds observed (Figure S7) and was absent from our phytoplank-  
217 ton cultures (Table S5).  $\beta$ -glutamic acid is a major osmolyte in methanogenic archaea  
218 (32, 33), prompting us to search for this compound in *Nitrosopumilus maritimus* strain  
219 SCM1, a model species of Marine Group I Thaumarchaeota that are abundant in the  
220 ocean's subsurface (34). We grew *N. maritimus*, analyzed its metabolome, and found  
221  $\beta$ -glutamic acid as the most abundant identified metabolite, present at an intracellular  
222 concentrations of 730 mM (Table S6).

223 It is likely that some compounds in this group were not made 'freshly' by primary  
224 producers like phytoplankton or ammonia oxidizing archaea but were rather a sig-  
225 nature of reworked particulate matter. For example, the compound arsenobetaine,  
226 which we detected in all of our environmental samples and, similar to  $\beta$ -glutamic acid,  
227 generally increased with depth in the depth profiles (Figure S7). This compound is a  
228 byproduct of heterotrophic degradation of phytoplankton-produced arseno-metabo-  
229 lites (35) and would therefore necessitate a co-culture in order to be observed in a  
230 laboratory setting (as well as a growth media with arsenic). Finally, it is likely that the  
231 cultures explored here were not producing all the compounds they are genetically able  
232 to produce — in previous laboratory experiments certain metabolites accumulate in  
233 cultures under specific environmental conditions and are not detectable under other  
234 environmental conditions (20, 21). If the production of certain compounds is variable  
235 or at rates below detection, we may not have seen them on our culture data.

236 **Metabolites as a quantitative component of the bulk carbon pool.** We ob-  
237 tained absolute concentrations of the identified compounds to better understand the  
238 quantitative importance of these different metabolites within the particulate carbon  
239 landscape. The combined concentration of the identified metabolites (85 of the 313



Heal et al.

total) ranged from 68–234 nM particulate carbon in the surface transect samples (Figures S1, and S8; Table S9). This corresponds to 2.9% ( $\pm$  1.0%) to 5.2% ( $\pm$  1.4%) of the particulate carbon pool and 2.6% ( $\pm$  1.0%) to 8.2% ( $\pm$  2.4%) of the particulate nitrogen pool across this transect (Table S9). There was no clear pattern in the percent of particulate carbon or nitrogen characterized by the quantifiable metabolites with latitude; this is likely confounded by the high variability in the particulate carbon and nitrogen measurements and the low geographical resolution of the metabolite sampling. In the NPTZ depth profile, we quantified 17–966 nM of particulate carbon in the metabolite pool, corresponding to a rough estimate of 10% of the particulate carbon and nitrogen pools in the surface sample (Table S9). In the NPSG profile, we quantified approximately 3.7% of the total carbon pool in the surface sample (Table S9). The concentration of surface particulate metabolites was approximately two times higher than what we observed a year later in the NPSG (during the transect sampling, Table S9), likely due to the fact that the NPSG depth profile was sampled within an anticyclonic eddy with high surface primary productivity and particulate carbon (36).

Quantitatively, the environmental metabolite pools were dominated by a handful of abundant compounds, similar to previous work (12, 23). There were obvious differences in metabolite composition between the three environmental samplings (Figure 4). For example, on a molar basis, glycine betaine contributed to up to 17% of the quantified metabolite pool in samples below 125 m in the NPTZ, substantially more (on a mole fraction basis) than the other data sets. In contrast, the NPSG depth profile had high contributions from gonyol in the surface and guanine at depth.

We quantified the same molecules in the 21 species of phytoplankton and one species of Thaumarchaeota (Table S3, Figures 5, S9). Most of the abundant compounds in the environment were also found in high abundance in at least some of our cultures, though many of the most abundant compounds were not ubiquitously observed across the cultures (e.g., glycine betaine and sucrose; Figure S9). We estimated the contribution of each metabolite to the carbon pool within each organism and compared this value to the surface samples of particulate metabolites in the field (Figure S5). This comparison yielded a consistency suggesting most of the surface particles contain compounds that have not been heavily reworked, corroborating previous work looking at macromolecule pools (37), particularly in the compounds found within the ‘core metabolome’ meta-cluster in Figure 3 (Figure S5). Comparing our environmental data sets to the culture data sets highlights compounds that were over-represented in either the culture data sets or environmental data set in a quantitative sense. For example, common compounds guanine and creatine and less well studied compounds like isethionic acid and dimethylsulfonioacetate (DMS-Ac), were all higher on a per carbon basis in the environment than in any of our cultures.

**Homarine, an understudied metabolite of high abundance.** The metabolite homarine (*N*-methylpicolinic acid) was present at 0.6 to 67 nM in marine particles, represented up to 3% of the total PC pool in our transect samples, and was the most abundant compound measured in our data sets (Figures 4, 6, and S9; Table S10). We found these concentrations surprising both in their absolute abundance and when compared to other more commonly studied polar metabolites known to accumulate in marine phytoplankton. For example, other studies have shown that homarine in marine particles is less abundant than the compatible solute glycine betaine (GBT) (38, 12), contrasting our findings. Both homarine and GBT are zwitterionic nitrogenous betaines that likely serve (at least in part) as compatible solutes. We also detected trigonelline (*N*-methylnicotinic acid), an isomer of homarine, albeit at much lower concentrations (1–300 pM in transect samples; Figures 6 and S9; Table S10). To our knowl-

## Community metabolomics

290 edge, trigonelline has not been previously detected in any marine samples, though it  
291 has been highlighted as an important component of labile carbon in terrestrial ecosys-  
292 tems due to its accumulation in higher plants (39).

293 In our cultured isolates, we detected homarine in both *Synechococcus* strains (in-  
294 tracellular concentration up to 400 mM), four of six surveyed diatoms (0.5–57 mM) and  
295 one strain of *Emiliania huxleyi* (a haptophyte, at 3.8 mM, Figure 6D, Table S8). Homarine  
296 has been observed in diatoms and *E. huxleyi* in previous studies (20, 40, 41, 42, 43, 44),  
297 but has not been associated with the ubiquitous marine cyanobacteria *Synechococcus*.  
298 We estimated that homarine was 4.8% of the particulate carbon within *Synechococ-*  
299 *cus* strain WH8102. *Synechococcus* has been estimated to contribute 10–20% of global  
300 ocean net primary production at approximately 8 Gt C per year (45); by extrapolation  
301 this suggests up 0.5–1% global ocean net primary production could be attributed to  
302 this one molecule through *Synechococcus*, with potential for more production from di-  
303 atoms. A caveat to this calculation is that homarine production is not quantitatively  
304 consistent among different strains of *Synechococcus*; *Synechococcus* WH7803 produced  
305 nearly 100 times less homarine (4–5 mM) under the same growing conditions (Figure  
306 6, Table S8). This estimation is a first pass with the limited data at hand, and the siz-  
307 able standing stock of homarine in our northern samples (about 2% of the PC) far ex-  
308 ceeds what we would expect from the observed *Synechococcus* standing stock, which  
309 contributes less than 10% of the total PC pool (Figure S3). Homarine had a clear at-  
310 tenuation with depth in both of our depth profiles (within ‘mode *b*’ in the NPTZ and  
311 ‘mode *d*’ in the NPSG in Figure 1, shown in detail in Figure 6B, C). All together, these  
312 data support active production and cycling of this compound in the surface ocean that  
313 has been previously unnoticed.

314 Homarine showed a clear spatial pattern along our transect with nearly ten times  
315 higher abundance in the NPTZ (average 14.3 nM) than the NPSG (average 1.85 nM)  
316 (Figure 6A), which we hypothesize is a result of the changing phytoplankton commu-  
317 nity and increasing prevalence of *Synechococcus* around 32°N (Figure S3) and diatoms  
318 further north (indicated by increasing fucoxanthin around 34°N, Figure S6). Since *Syne-*  
319 *chococcus* standing stock cannot explain the observed homarine concentrations, we  
320 hypothesize that this compound may transfer to and accumulate in organisms be-  
321 yond *Synechococcus*, which has been observed for osmolytes in other systems (44).  
322 Trigonolline followed a similar pattern along the transect, but with less pronounced  
323 increase in concentration from the NPSG (average 0.07 nM) to the NPTZ (average 0.14  
324 nM) that was shifted more northward (Figure 6A). Homarine decreased sharply with  
325 depth in both depth profiles while trigonelline did not show appreciable attenuation  
326 in the NPSG profile (Figure 6B, C).

327 Biochemically, the sources and sinks for homarine and trigonelline are likely dis-  
328 tinct. Trigonelline is produced from nicotinic acid (46), while homarine is decarboxy-  
329 lated from quinolinic acid, which is produced from tryptophan (47), though the ex-  
330 act enzyme that performs the decarboxylation has not been characterized. The first  
331 step of bacterial trigonelline degradation is the opening of the aromatic ring by the  
332 TgnA/TgnB oxygenase system (39). This enzymatic machinery is unlikely to operate on  
333 homarine due to steric hindrance in the ring-opening step. Supporting the differential  
334 catabolism of homarine and trigonelline, we saw that the model marine heterotrophic  
335 bacteria *Ruegeria pomeroyi* DSS-3 was not able to grow on homarine as effectively as  
336 trigonelline (Figure S10). Without characterized biosynthetic or degradation pathways  
337 for homarine, it is not surprising that this metabolite has not been identified as an im-  
338 portant component of the labile organic carbon and nitrogen pools using gene-based  
339 techniques. Our spatial patterns and divergent observations of these compounds in

Heal et al.

our cultured organisms (Figure 6D) support distinct biological sources for these structurally similar compounds, demonstrating the intricate networks that exist in microbial communities rooted in the substrate-matched metabolisms.

Our observations of trigonelline and homarine were possible because of the chromatography methodology we employed (hydrophilic interaction liquid chromatography, HILIC) — the compounds would not be resolved in time in more commonly employed reversed phase chromatography (23, 25) due to their high polarity and same empirical formula (and therefore exact mass, Figure 6E). This is also true for many sets of isomers of known compounds (e.g., sarcosine,  $\beta$ -alanine, and alanine; homoserine and threonine;  $\beta$ -glutamic acid and glutamic acid) as well as unknowns (e.g., inosine and another unidentified metabolite with the same  $m/z$ ; two metabolites with an  $m/z$  of 236.1492; see Table S5). We bring attention to this detail to highlight the power of incorporating cutting-edge analytical capabilities to study microbial ecology — without HILIC chromatography, we would not have been able to accurately measure many of the most abundant polar compounds.

**Organic sulfur compounds.** Six of the top 30 most abundant compounds in our environmental samples were organic sulfur compounds. These compounds fall into two general categories; sulfoniums ( $[\text{SR}_3]^+$ ) and sulfonates ( $[\text{RSO}_3]^-$ ). We detected the well-studied sulfonium compound DMSP, though our methods likely underestimated the concentration due to compound instability in methanol-based extractions (48). Using our untargeted approach, we putatively identified two additional sulfonium compounds, dimethylsulfonioacetate (DMS-Ac) and 3-5-dimethylsulfonio-3-hydroxypentanoate (gonyol), as prominent peaks in our environmental samples. We later obtained standards that confirmed these identifications and enabled quantification that revealed gonyol as among our most abundant compounds with a particularly high concentration (up to 2.5 nM) in the NPSG depth profile (Figure S11). Gonyol was named after the dinoflagellate *Gonyaulax polyedra* (49), and gonyol was present in high concentration in all four dinoflagellate strains (81–196 mM) and in lower concentrations in the haptophytes (23–61 mM, Figures S9, S11, Table S6). The environmental samples contained more DMS-Ac per unit carbon than culture samples, suggesting a source of this compound in the environment not reflected in the cultured phytoplankton (Figure S5). Both of these compounds share structural similarity with DMSP, and disrupt bacterial DMSP degradation pathways (50). Thus, predicting marine DMS production from DMSP may be complicated by these highly abundant compounds. Although marine organic sulfur has gained much attention with regards to its massive inventory (51) and role in microbial processes (52), ours are the first observations of these understudied sulfoniums in natural marine systems.

**Remaining unidentified compounds.** Many of the metabolites with interesting patterns across space and taxonomy could not be identified (Table S5). For example, the mass feature “I121.0684R10.7” has a  $m/z$  of 121.0684 and major peak in its MS<sup>2</sup> fragmentation spectra of  $m/z$  63.02703 (Table S5). This metabolite likely has the empirical formula of  $\text{C}_5\text{H}_{12}\text{OS}$  and was observed in 19 of the 21 phytoplankton species, attenuated with depth, and had a distinct maximum from 32–34°N in the meridional transect (Table S5). Unfortunately, none of the possible matches to these compounds have fragmentation data in the major mass spectral databases; without an identification, we cannot quantify this compound. It is very likely that within these unidentified compounds are more underappreciated compounds involved in the microbial loop — a fruitful endeavour for future oceanographers, mass spectrometrists, and biochemists alike.



389 **Conclusions.** Small molecules within marine particulate organic matter contribute  
390 to the dissolved organic matter pool after excretion, cell lysis, or sloppy feeding. Once  
391 in a dissolved form, other organisms in the environment may be able to use these com-  
392 pounds as substrates as sources for carbon, nutrients, and energy (53, 54), if they have  
393 the required enzymatic machinery to access these resources. These small molecules  
394 may also act as chemical attractants or deterrents for organisms and therefore as-  
395 sist in shaping microbial communities. By directly observing small molecules in both  
396 field particulate material and cultured phytoplankton, we show that small molecules in  
397 natural marine systems are determined in part by the taxonomy of the phytoplankton  
398 community. This suggests that to access these pools of labile organic carbon the wider  
399 microbial community must be adapted to phytoplankton community composition. By  
400 quantitatively contextualizing our metabolomics data sets, we uncover a rich set of  
401 compounds that likely fuel the microbial loop that have been previously overlooked.  
402 Cycling of organic matter thus depends both on the amount of primary productivity  
403 and phytoplankton composition — *who* matters on a chemical level.

## 404 MATERIALS AND METHODS

405 **Environmental sample collection.** Samples were collected for environmental  
406 metabolomics of particulate material at locations shown in Figure 1. Samples for the  
407 NPSG depth profile were collected aboard the R.V. Kilo Moana cruise KM1513 on July  
408 31, 2015 from four depths (15, 45, 75, and 125 m); we reported on these samples in  
409 a previous publication (16). Samples for the meridional transect were collected on  
410 cruise KOK1606 aboard the R.V. Ka'imikai-O-Kanaloa from April 20 to May 2, 2016, all  
411 at approximately 15 m. Samples for the NPTZ depth profile were collected during  
412 MGL1704 aboard the R.V. Marcus Langseth at seven depths between 30 and 250 m  
413 on June 3, 2017. At each sampling location and depth, single, duplicate, or triplicate  
414 filters were collected for environmental metabolomics, as previously described (16),  
415 using either niskin bottles or the uncontaminated underway seawater intake. Table  
416 S1 has summarized descriptions of the samples collected for metabolomics, with full  
417 description of each sample (including time of collection) in Table S4. In short, samples  
418 (4–15 L each) were collected into polycarbonate carboys, filtered onto 147 mm 0.2  $\mu\text{m}$   
419 PTFE filters using a peristaltic pump, flash frozen in liquid  $\text{N}_2$ , and stored at  $-80^\circ\text{C}$  until  
420 extraction. In addition to our samples, we filtered duplicates of methodological blanks  
421 by filtering seawater through two 0.2  $\mu\text{m}$  PTFE filters in series and used the second fil-  
422 ter as the blank. This blank is especially important to parse metabolite signals from  
423 contaminants as well as compounds within the residual dissolved pool and salt matrix  
424 adsorbed during filtration.

425 **Pure cultures and sampling.** In addition to environmental samples, we analyzed  
426 metabolomes of cultured representatives of marine phytoplankton that were grown  
427 and analyzed on the same LC/MS system as previously presented (5). Media, light,  
428 and temperature were chosen for optimal growth of each species and are reported  
429 in (5). In short, axenic phytoplankton were cultured in controlled laboratory settings  
430 and harvested under exponential growth using a gentle vacuum filtration onto 47 mm  
431 Durapore filters (pore size 0.2  $\mu\text{m}$ ). Samples were flash frozen in liquid  $\text{N}_2$  and stored  
432 at  $-80^\circ\text{C}$  until extraction. In addition to samples, media blanks corresponding to each  
433 media type were harvested and served as matrix blank to each corresponding phyto-  
434 plankton sample. In order to estimate intracellular concentrations of metabolites, we  
435 used biovolume estimates from (5).

436 We also grew *Nitrosopumilus maritimus* strain SCM1 and harvested under exponen-  
437 tial growth. Pure culture of Marine Group I Thaumarchaeota *Nitrosopumilus maritimus*

Heal et al.

438 strain SCM1 was maintained in liquid mineral medium with 1 mM ammonia (55) at  
439 30°C in the dark without shaking. The growth of *N. maritimus* was monitored by mea-  
440 suring nitrite production and cell abundance. Nitrite concentration was determined  
441 spectrophotometrically using the Griess reagent (56). Cell counts were determined  
442 using Moviol-SYBR Green I staining protocol as previously reported (57) with a Zeiss  
443 epifluorescence microscope to count 15 random fields of view for each sample with  
444 30 to 200 cells per field. Mid-exponential phase cells were harvested using a gentle  
445 vacuum filtration on 0.22  $\mu\text{m}$  Durapore membrane filters (Millipore Co., MA, U.S.) and  
446 stored at -80°C until metabolite extractions. These archaea have a biovolume of ap-  
447 proximately 0.023  $\mu\text{m}^3$  (58).

448 We estimated carbon contents for all the cultures from cellular volume (59), using  
449 an empirical relationship between flow cytometry-based cell size and PC (60), or using  
450 previous direct measurements (60, 61, 62). An abbreviated sample description is given  
451 in Table S3; full sample descriptions are in Table S7 (including carbon estimates and  
452 the method used for each species).

453 **Additional oceanographic data.** Samples for particulate carbon were sampled  
454 and processed as in (63). Underway flow cytometry data were acquired and processed  
455 as in (60). Samples for pigment analysis were filtered onto GF/F filters (Whatman),  
456 stored in snap-cap tubes, wrapped in aluminum foil, and flash-frozen. Samples were  
457 analyzed for high performance liquid chromatography (HPLC)-based measurements  
458 of total chlorophyll (monovinyl + divinyl), fucoxanthin and other photosynthetic and  
459 photoprotective pigments. These analyses were made in the Oregon State University  
460 HPLC facility via a Waters 996 absorbance photodiode array detector in combination  
461 with a Waters 2475 fluorescence detector according to the protocol of (64).

462 **Homarine bioavailability experiment.** To test if homarine was as bioavailable  
463 as trigonelline in marine systems, we cultured the model marine heterotrophic bacte-  
464 ria *Ruegeria pomeroyi* DSS-3 under different primary carbon sources and observed its  
465 cell density. DSS-3 were streaked to isolation on 1/2 ytss agar plates (1.25g tryptone,  
466 2g yeast extract, 10g sea salts, 8g agar per 500 mL MQ water) from frozen glycerol  
467 stocks at room temperature 3 d. A single colony was inoculated into artificial L1-bac  
468 seawater media (described below) supplemented with acetate (final concentration of  
469 50 nM). This culture was grown overnight at room temperature at 200 r.p.m at 30°C.  
470 Next, a 96 well plate was prepared with 90  $\mu\text{L}$  of fresh media described above (without  
471 additional carbon) in all wells. In 8 wells, we added 5  $\mu\text{L}$  of the overnight inoculum and  
472 10  $\mu\text{L}$  of water (no additional carbon treatment). In 8 wells, we added 15  $\mu\text{L}$  of water  
473 and no inoculum (negative control). In the remaining wells, we added 5  $\mu\text{L}$  of the  
474 overnight inoculum and 10  $\mu\text{L}$  of either acetate, homarine, or trigonelline (all at 100  
475 nM carbon,  $n = 8$  for each, acetate serving as positive control). Plates were covered in  
476 a breathable sealing membrane (Breathe-Easy) and placed into a platereader (Biotek  
477 Synergy H1MF). Cultures were grown at 30°C, shaken every 2 minutes for 3 seconds,  
478 and monitored via absorbance at 600 nm every 2 minutes (immediately after shaking).

479 Artificial L1-bac seawater media was prepared using MQ water with 28 g Sigma  
480 sea salts, trace and macro nutrients based on the recipe from the National Center for  
481 Marine Algae and Microbiota (without silica), nitrogen, and vitamins as in (18), Sigma  
482 M5550 MEM essential amino acids (1:1000 dilution), Sigma M7145 MEM non-essential  
483 amino acids (1:2000 dilution). Salt water was autoclaved in combusted borosilicate  
484 glass containers and all additions were made from filter sterilized stocks. Final media  
485 was filter sterilized using a 0.22  $\mu\text{m}$  PVDF membrane bottle top filter.

486 **Metabolite data acquisition.** Metabolites were extracted as previously described  
487 (16). Briefly, filters were bead-beaten three times in 30 s bursts over 30 minutes (kept

## Community metabolomics

488 at  $-20^{\circ}\text{C}$  between bursts) in 1:1:2 methanol, water, dichloromethane and separated  
489 into two fractions: a polar aqueous extract (methanol and water extractable) and an  
490 organic extract (dichloromethane extractable). We used the same internal standard  
491 suite at the same injection concentrations as in Boysen *et al.* (16) to train normaliza-  
492 tion and monitor instrument stability. After drying under clean  $\text{N}_2$  all samples were  
493 reconstituted in 400  $\mu\text{L}$  water.

494 The polar fraction of this extract was analyzed on both reversed phase (RP) and  
495 hydrophilic interaction chromatography (HILIC) using the same solvents, columns, and  
496 gradients as previously reported (16). We diluted the KOK1606 samples (1 part sample  
497 to 2 parts water) and MGL1704 samples (1 part sample to 1 part water) which helped  
498 with signal stability over the course of the runs. Internal standards were added during  
499 the dilution step and were the same concentrations in all analyzed samples to aid in  
500 quantitative comparisons between sample sets. We injected 2  $\mu\text{L}$  of sample onto the  
501 column for HILIC analysis, and 5  $\mu\text{L}$  (for environmental samples) or 15  $\mu\text{L}$  (for culture  
502 samples) for RP analysis .

503 Both LC configurations (RP and HILIC) were analyzed on a Thermo Q-Exactive (QE)  
504 mass spectrometry in full scan mode for quantitative data, or data dependent acqui-  
505 sition (DDA) for fragmentation. Full scan analyses were conducted as in Boysen *et al.*  
506 (16); pooled samples were run in DDA mode for  $\text{MS}^2$  fragmentation as described in  
507 Heal *et al.* (20).

508 **Metabolomic data processing.** To compare our field data with our culture data,  
509 we used our untargeted data from the meridional transect (36 surface samples) as our  
510 template to examine the other sample sets. To do this, we used an established untar-  
511 geted metabolomics approach (detailed below) to acquire a list of curated, derepli-  
512 cated, and high-quality mass features. With this curated list, we then searched for the  
513 same mass features in the remaining field and culture sample sets. This allowed us  
514 to compare relative abundances of these mass features within each sample set, with  
515 high confidence in the shared identity of these compounds between sample sets.

516 Untargeted metabolomics data from transect samples were converted with MSCon-  
517 vert (65) and processed through XCMS (66, 67, 68), using the same parameters for  
518 XCMS and methodological blank filtering as previously reported (20). Next, we nor-  
519 malized for obscuring variation (non-biological variability inherent to LC-MS analysis)  
520 using B-MIS normalization (16). Like in Heal *et al.* (2019), we disregarded peaks that  
521 did not demonstrate acceptable replicability in the pooled samples (coefficient of vari-  
522 ance  $> 30\%$ ); we also removed peaks that showed greater average variability between  
523 biological replicates than over the whole sample set as in previous work (4).

524 In untargeted metabolomics, multiple mass features can correspond to one metabo-  
525 lite due to natural abundance isotopes, adducts, or multiply charged ions. Like in Heal  
526 *et al.* (2019), to avoid putting extra statistical weight on these isotopes and adducts,  
527 we identified mass features that were likely  $^{13}\text{C}$ ,  $^{15}\text{N}$ , or  $^{34}\text{S}$  isotopologues of other  
528 mass features. We extended this search to include adducts of  $\text{Na}^+$ ,  $\text{NH}_4^+$ ,  $\text{K}^+$ , (for posi-  
529 tive ionization) and  $\text{Cl}^-$  (for negative ionization), as well as for doubly charged ions of  
530 mass features whose  $\text{M}+\text{H}$  ion was present. We performed these searches within each  
531 three second (for RP) or six second (for HILIC) corrected retention time window and  
532 discarded these mass features from downstream statistical analyses.

533 For the largest 200 peaks in our HILIC analysis (positive and negative analyzed sep-  
534 arately) and RP analysis, we exported the  $m/z$  and retention time information to Skyline  
535 (69) for closer inspection. XCMS peak picking algorithms assume a normal Gaussian  
536 shape for peaks (66, 67, 68), which often results in poor integrations for compounds  
537 that do not achieve this shape during chromatographic separation; these peaks are

Heal et al.

538 often removed during our CV filter or manual peak quality verification. Therefore, we  
539 also imported a list of compounds we regularly target (see (16) for full list of standards)  
540 and manually integrated these compounds in each of the samples (first removing com-  
541 pounds that were picked during the peak picking step). In Skyline (69), we integrated  
542 these peaks (both the untargeted and known compounds) in the transect data set  
543 since XCMS often results imperfect integrations that can introduce non-biological vari-  
544 ability to metabolite abundances (70). Next, we eliminated mass features that were  
545 not present in at least 50% of the transect samples and also removed peaks that were  
546 not (on average) three times larger than the matrix blank. These stringent filters in the  
547 transect data set allowed us to use a culled number of high-quality mass features that  
548 are common in surface seawater particles as a fingerprint of metabolite pools. In all,  
549 we obtained 149, 74, and 90 high-quality, manually integrated peaks in HILIC-positive  
550 ionization (HILICPos), HILIC-negative ionization (HILICNeg), and RP, respectively. For  
551 these quality mass features, we searched for corresponding MS<sup>2</sup> scans in the data  
552 dependent acquisition (DDA) files and applied a filter to remove low abundance frag-  
553 ments in the exact manner as reported in (20).

554 With this list of high-quality mass features (referred to in the text as metabolites),  
555 we extracted the exact masses and integrated peaks at the same retention times in  
556 the two other environmental data sets (NPSG and NPTZ depth profiles) and the cul-  
557 ture data sets. We also integrated our internal standards (in exact concentrations  
558 as in (16)) and performed B-MIS normalization (16) across our environmental data  
559 sets which minimizes the variability present during analysis (not biological variability).  
560 This resulted in *adjusted areas* of each compound in each sample that are quantita-  
561 tively comparable within each sample set (but not between). Since the phytoplank-  
562 ton data sets are not in a consistent matrix and were analyzed in several different  
563 batches, we did not attempt to use B-MIS to normalize across the organisms. Instead,  
564 we kept the raw peak area, normalized it to the biovolume analyzed, and made semi-  
565 quantitative comparisons on the log<sub>10</sub> transformed biovolume-normalized peak areas.  
566 The log<sub>10</sub> transformations ensures that only large differences are evaluated as con-  
567 tributing to variability between samples, well beyond matrix variability or instrument  
568 performance.

569 As in (20), we used the ranking system outlined in (71), to attempt to identify the  
570 quality mass features present in these sample sets in an automated fashion. We  
571 searched an internal database of compounds with known exact *m/z* and retention  
572 time on the LC-MS configurations used in the lab (found at [https://github.com/Ingalls-  
573 LabUW/IngallsStandards](https://github.com/Ingalls-LabUW/IngallsStandards)), publicly available MS/MS<sup>2</sup> spectral databases (72, 73, 74,  
574 75, 76), and to compounds in the KEGG database (77, 78) (based only on *m/z*).

575 **Calculating concentrations.** Commercially available standards were analyzed in  
576 the same batch as each of the three environmental data sets. For this subset of com-  
577 pounds, we calculated absolute concentrations, similar to previous work (21, 40, 12).  
578 In short, we applied the following calculation for each analyte.

$$579 \text{Concentration} = \frac{\text{Area}}{RF} \times \frac{\text{Vol}_{\text{reconst}}}{\text{Vol}_{\text{filtered}}} \times \frac{1}{(RF_{\text{ratio}})}$$

580 Where *RF* is the response factor ( $\frac{\text{Area}}{\text{concentration}}$ ) of each compound at known concen-  
581 tration in water. Standards are run before and after each run on each instrument,  
582 therefore, an *RF* for each compound is obtained within each batch. *Vol*<sub>reconst</sub> is the  
583 volume that the samples were reconstituted into; *Vol*<sub>filtered</sub> is the volume filtered in  
584 the field (for environmental samples) or the total estimated biovolume collected (for  
585 culture samples); *RF*<sub>ratio</sub> is the  $\frac{RF_{\text{matrix}}}{RF_{\text{water}}}$  these compounds in a matrix of marine partic-  
586 ulates (as described in Boysen *et al.* (16)), we calculated *RF*<sub>ratio</sub> using samples from  
587 the transect data set which were applied throughout. We calculated a *RF*<sub>ratio</sub> as in (16)

## Community metabolomics

588 using a representative environmental matrix sample. Values for  $Vol_{filtered}$  for each  
589 sample are reported in Tables S4 and S7;  $Vol_{reconst}$  was 400  $\mu$ L for each sample.

590 Several compounds were identified in the transect data set and purchased and  
591 analyzed using the same LC/MS method at a later date, which we quantified using the  
592 same approach as in (40). Because the  $RF$  for each compound can vary substantially  
593 between analytical runs, we used a relative response factor ( $RF_{relative}$ ) to estimate  $RF$   
594 and calculate the concentrations of these compounds in earlier runs. To calculate  
595  $RF_{relative}$ , we matched compounds with a standard that had been analyzed in all sam-  
596 ple sets that share the same column, ionization state, and some structural similarity  
597 (matched standard). For instance, for the compound DMS-Ac, we matched it to an-  
598 other dimethylated sulfonium zwitterion, DMSP. After the samples were analyzed, we  
599 analyzed these new standards and the other standards on the same LC-MS set up as  
600 our sample set and calculated  $RF_{relative}$  using the following formula:

$$RF_{relative} = \frac{RF_{analyte}}{RF_{matched\ standard}}$$

601 Then we used this  $RF_{relative}$  and the  $RF_{matched\ standard}$  to calculate the concentration  
602 of the analyte from earlier runs. For a full explanation for how each compound was  
603 quantified in each sample set and for the matched standard used for each compound  
604 (when necessary), see Table S11.

605 **Statistical approaches.** For multivariate statistics on environmental samples, peak  
606 areas (adjusted via B-MIS for instrumental variability and normalized to water volume  
607 filtered) were standardized to the total peak area observed for each mass feature  
608 across each sample set. For each mass feature in the cultured organisms,  $\log_{10}$  trans-  
609 formed peak areas were standardized to the maximum  $\log_{10}$  peak areas observed  
610 across all cultured organisms. We used two different multidimensional approaches  
611 on these data sets, both non-metric to accommodate for the high variable to sample  
612 ratio and non-normal distribution of peak areas in our data sets. This prevents overfit-  
613 ting which can be a problem in other multidimensional approaches in metabolomics  
614 (79). We used a non-metric dimensional scaling (NMDS) analysis (80) based on a Eu-  
615 clidean distance matrix of standardized peak areas to visualize overall metabolic differ-  
616 ences between samples along our transect samples. We assessed dimensionality of  
617 the NMDS by examining a scree plot, calculated the probability with a Monte Carlo per-  
618 mutation which resulted in a low stress ordination. We accompanied this with an anal-  
619 ysis of similarities (ANOSIMS) (81) to discern differences between the oceanographic  
620 regimes we sampled as well as time of sampling. Data transformation, standardiza-  
621 tion, NMDS, and ANOSIMS statistics were performed in R using the `vegdist` (v2.4-2) or  
622 `vegan` (v2.4-2) packages.

623  
624 Next, we employed a  $k$ -medoids based clustering approach (82) which aggregates  
625 metabolites based on patterns across samples. We performed this clustering on the  
626 combined culture data sets and on the three environmental sample sets separately  
627 (four total  $k$ -medoids analyses) using the `clara` function in the `cluster` package (v2.1.0)  
628 in R. This non-supervised clustering technique is exclusive and non-hierarchical which  
629 assigns each mass feature into one cluster, or mode. The metabolites within each  
630 mode have similar patterns of abundance across samples. We chose the appropriate  
631 number of modes for each sample set by selecting the mode number that resulted in  
632 a local maximum average silhouette width between samples.

633 Finally, we investigated whether the resulting modes of metabolites from the four  
634 separate  $k$ -medoids analyses shared metabolites beyond a random assignment. Es-  
635 sentially, we asked if the patterns in the 2016 transect samples could be explained in  
636 part by patterns in metabolites across the available culture data or could be recapit-  
637 ulated in the depth profile sample sets. To test for over-represented sharing of me-



Heal et al.

638 tabolites between modes, we used a Monte Carlo resampling technique to simulate  
639 the random frequency of shared metabolites using 1000 permutations. We then com-  
640 pared the observed frequency of shared metabolites to the permutations to estimate  
641 the  $p$ -value of our observed shared metabolites.

642 For all data analysis, we used R v4.0.0. Codes for figures, tables, and data anal-  
643 ysis are found at [https://github.com/kheal/Gradients1\\_SemiTargeted3](https://github.com/kheal/Gradients1_SemiTargeted3). Raw data for  
644 metabolomics samples are deposited at Metabolomics Workbench; all cultures are  
645 under project ID is ST001514, project IDs for environmental samples listed in Table  
646 S4.

## 647 SUPPLEMENTAL MATERIAL

648 Supplemental Figures S1–S10 and Tables S1–S3 supplied in a combined document  
649 following the references with more detailed legends. Supplemental Tables S4–S11 are  
650 supplied as a combined .xlsx, full legends supplied here.

651 **FIG S1.** Particulate carbon over the April 2016 transect and total quantifiable par-  
652 ticulate metabolites.

653 **FIG S2.** Nonmetric multidimensional scaling comparison of metabolite profiles on  
654 the KOK1606 transect.

655 **FIG S3.** Populations of picoeukaryotes and picocyanobacteria over the transect,  
656 as observed via underway flow cytometry (SeaFlow).

657 **FIG S4.** Nonmetric multidimensional scaling comparison of metabolite profiles  
658 among the cultured organisms.

659 **FIG S5.** All identified and quantified compounds compared in carbon space in  
660 cultures and environmental samples.

661 **FIG S6.** Concentration of the pigment fucoxanthin over latitude in transect sam-  
662 ples.

663 **FIG S7.**  $\beta$ -glutamic acid and arsenobetaine depth profiles from the NPTZ.

664 **FIG S8.** Most abundant metabolites in environmental samples, presented as nmole  
665 carbon per L.

666 **FIG S9.** All identified compounds, with average and standard deviation of ob-  
667 served concentrations in surface seawater particles or in culture samples.

668 **FIG S10.** Growth curves of *Ruegeria pomeroyi* DSS-3 with three different carbon  
669 sources: acetate (positive control), homarine, and trigonelline, and no additional car-  
670 bon (negative control).

671 **TAB S1.** Summary of samples collected and analyzed in this study.

672 **TAB S2.** Summary of physical and chemical parameters on April 2016 cruise. Re-  
673 printed with permission from (27).

674 **TAB S3.** Summary of cultured organisms analyzed in this study.

675 **TAB S4.** Full sample descriptions for environmental samples. Binned latitude is  
676 the latitude used for plotting when aggregating the data. This table is supplied in a  
677 .xlsx file.

678 **TAB S5.** Peak areas from environmental and culture samples. MassFeature-Col-  
679 umn is the identifier for each distinct mass feature (identified or not), as in all tables.  
680 Identification is the best identification we have for the mass feature; Confidence is  
681 based on (71), with 1 as unequivocal (and quantifiable); mz is mass to charge ratio ob-  
682 served; rt is retention time (in seconds); Column is the chromatography method used  
683 (HILIC or RP); z is charge state in which the mass feature was observed (1 is positive,  
684 -1 is negative). This table is supplied in a .xlsx file.

685 **TAB S6.** Assignments of mass features compounds to modes and metaclusters (if  
686 applicable) as a result of the  $k$ -medoids clustering summarized in Figures 1, 2, and 3.

## Community metabolomics

687 MassFeature\_Column is the identifier for each distinct mass feature (identified or not),  
688 as in all tables. Identification is the best identification we have for the mass feature;  
689 Confidence is based on (71), with 1 as unequivocal (and quantifiable); m/z is mass to  
690 charge ratio observed; rt is retention time (in seconds); Column is the chromatography  
691 method used (HILIC or RP); z is charge state in which the mass feature was observed  
692 (1 is positive, -1 is negative). MS2 is the MS<sup>2</sup> spectra for the peak in a pooled sample  
693 from the transect sample set. This table is supplied in a .xlsx file.

694 **TAB S7.** Full sample descriptions for culture samples. All volumes in  $\mu$ L. Carbon  
695 estimates are based on (59, 60, 61, 62), as indicated. This table is supplied in a .xlsx  
696 file.

697 **TAB S8.** Quantified metabolites from all culture samples. Compound names are  
698 given as reported in figures and as more complete names for clarity. All values intra-  
699 cellular in  $\mu$ mol metabolite per L. Sample identifiers are elaborated in Table S7. This  
700 table is supplied in a .xlsx file.

701 **TAB S9.** Total quantifiable metabolites as a fraction of the particulate carbon and  
702 nitrogen pools. All measurements are mean (standard deviation), except when  $n =$   
703 1. Standard deviations of calculations (percentages) are propagated. Note that we  
704 do not have bulk particulate carbon or nitrogen measurements paired with the depth  
705 profiles. This table is supplied in a .xlsx file.

706 **TAB S10.** Quantified metabolites from all environmental samples. Compound  
707 names are given as reported in figures and as more complete names for clarity. All  
708 values are  $\mu$ mol metabolite per L seawater. Sample identifiers are elaborated in Table  
709 S4. This table is supplied in a .xlsx file.

710 **TAB S11.** Quantification method for each quantified metabolite in each sample set.  
711 Proxy compound (when applicable) is the compound by which a relative response fac-  
712 tor (RF) was calculated. This table is supplied in a .xlsx file.

## 713 ACKNOWLEDGMENTS

714 We would like to thank Grace Workman, Natalie Kellogg, Regina Lionheart, Rhonda  
715 Morales, and Alexa Wied for assistance in growing or enumerating cultures, extracting  
716 environmental metabolomics samples, and preliminary data processing. We acknowl-  
717 edge the science team and crew of KM1314, KOK1606, and MGL1704 cruises (particu-  
718 larly Rachele Lim and Ryan Grossmann) for sample collection. We thank G.Pohnert for  
719 the generous donation of gonyol and DMS-acetate standards. Cultures were provided  
720 by D. Stahl, S. Chisholm, A. Coe, M. Moran and M. Saito. This work was supported by  
721 grants from the Simons Foundation (385428 to A.E.I.; 426570 to E.V.A., A.E.I., A.E.W.,  
722 and R.M.B.; 548565 to W.Q.; 598819 to K.R.H.), the National Science Foundation (NSF  
723 GRFP to A.K.B. and K.R.H.; NSF OCE-PRF 1521564 to B.P.D., NSF IGERT Program on  
724 Ocean Change to A.K.B).

## 725 REFERENCES

1. **Falkowski PG, Wilson C.** 1992. Phytoplankton productivity in the North Pacific ocean since 1900 and implications for absorption of anthropogenic CO<sub>2</sub>. *Nature* 358:741–743.
2. **Walpole SC, Prieto-Merino D, Edwards P, Cleland J, Stevens G, Roberts I.** 2012. The weight of nations: an estimation of adult human biomass. *BMC Public Health* 12 (1):1.
3. **Azam F, Fenchel T, Field JG, Gray JS, Meyer-Reil LA, Thingstad F.** 1983. The ecological role of water-column microbes in the sea. *Mar Ecol* 10 (3):257–263.
4. **Johnson WM, Kido Soule MC, Kujawinski EB.** 2016. Evidence for quorum sensing and differential metabolite production by a marine bacterium in response to DMSP. *ISME J.* 10:2304–2316.
5. **Durham BP, Boysen AK, Carlson LT, Groussman RD, Heal KR, Cain KR, Morales RL, Coesel SN, Morris RM, Ingalls AE, Armbrust EV.** 2019. Sulfonate-based networks between eukaryotic phytoplankton and heterotrophic bacteria in the surface ocean. *Nat Microbiol* 4 (10):1706–1715. doi:10.1038/s41564-019-0507-5.
6. **Amin SA, Hmelo LR, van Tol HM, Durham BP, Carlson LT, Heal KR, Morales RL, Berthiaume CT, Parker MS, Djunaedi B, Ingalls AE, Parsek MR, Moran MA, Armbrust EV.** 2015. Interaction and signalling between a cosmopolitan phytoplankton and associated bacteria. *Nature* 522:98–101.

Heal et al.

7. **Durham BP, Sharma S, Luo H, Smith CB, Amin SA, Bender SJ, Dearth SP, Van Mooy BAS, Campagna SR, Kujawinski EB, Armbrust EV, Moran MA.** 2015. Cryptic carbon and sulfur cycling between surface ocean plankton. *Proc Natl Acad Sci United States Am* 112 (2):453–457.
8. **Bertrand EM, McCrow JP, Moustafa A, Zheng H, McQuaid JB, Delmont TO, Post AF, Sipler RE, Spackeen JL, Xu K, Bronk DA, Hutchins D, Allen AE.** 2015. Phytoplankton-bacterial interactions mediate micronutrient colimitation at the coastal Antarctic sea ice edge. *Proc Natl Acad Sci United States Am* 112:9938–9943.
9. **Heal KR, Qin W, Ribalet F, Bertagnolli AD, Coyote-Maestas W, Hmelo LR, Moffett JW, Devol AH, Armbrust EV, Stahl DA, Ingalls AE.** 2017. Two distinct pools of B<sub>12</sub> analogs reveal community interdependencies in the ocean. *Proc Natl Acad Sci United States Am* 114 (2):364–369.
10. **Paerl RW, Sundh J, Tan D, Svenningsen SL, Hylander S, Pinhassi J, Andersson AF, Riemann L.** 2018. Prevalent reliance of bacterioplankton on exogenous vitamin B1 and precursor availability. *Proc Natl Acad Sci United States Am* 115 (44):E10447–E10456. doi: [10.1073/pnas.1806425115](https://doi.org/10.1073/pnas.1806425115).
11. **Sunda WG, Kieber D, Kiene RP.** 2002. An antioxidant function of DMSP and DMS in marine algae oceanic dimethylsulfide (DMS) photolysis. *Nature* 418:317–320. [www.nature.com/nature](http://www.nature.com/nature).
12. **Boysen AK, Carlson LT, Durham BP, Groussman RD, Aylward FO, Ribalet F, Heal KR, DeLong EF, Armbrust EV, Ingalls AE.** 2020. Diel Oscillations of Particulate Metabolites Reflect Synchronized Microbial Activity in the North Pacific Subtropical Gyre. bioRxiv doi: [10.1101/2020.05.09.086173](https://doi.org/10.1101/2020.05.09.086173).
13. **Slattery M, Hamann MT, McClintock JB, Perry TL, Puglisi MP, Yoshida WY.** 1997. Ecological roles for water-borne metabolites from Antarctic soft corals. *Mar Ecol Prog Ser* 161:133–144.
14. **Sheng J, Malkiel E, Katz J, Adolf JE, Place AR.** 2010. A dinoflagellate exploits toxins to immobilize prey prior to ingestion. *Proc Natl Acad Sci United States Am* 107 (5):2082–2087. doi: [10.1073/pnas.0912254107](https://doi.org/10.1073/pnas.0912254107).
15. **Kido Soule MC, Longnecker K, Johnson WM, Kujawinski EB.** 2015. Environmental metabolomics: Analytical strategies. *Mar Chem* 177:374–387. doi: [10.1016/j.marchem.2015.06.029](https://doi.org/10.1016/j.marchem.2015.06.029).
16. **Boysen A, Heal K, Carlson L, Ingalls A.** 2018. Best-matched internal standard normalization in liquid chromatography-mass spectrometry metabolomics applied to environmental samples. *Anal Chem* 90 (2):1363–1369.
17. **Fassbender AJ, Palevsky HI, Martz T, Ingalls AE, Gledhill M, Fawcett S, Brandes JA, Aluwihare LI, Aluwihare L, Anderson R, Bender S, Boyle E, Brandes J, Bronk D, Buesseler K, Burdige D, Casciotti K, Close H, Conte M, Cutter G, Estapa M, Fassbender A, Fennel K, Ferron S, Glazer B, Goni M, Grand M, Guay C, Hatta M, Hayes C, Horner T, Ingall E, Ingalls A, Johnson K, Juranek L, Knapp AN, Lam P, Luther G, Matrai P, Measures C, Nicholson D, Paytan A, Pellenbarg R, Pependorf K, Reddy C, Ruttenberg K, Sabine C, Sansone F, Shaltout N, Sikes E, Sundquist E, Valentine D, Wang ZA, Wilson S, Barrett P, Behrens M, Belcher A, Biermann L, Boiteau R, Clarke J, Collins J, Coppola A, Ebling A, Garcia-Tigreros F, Goldman J, Guallart EF, Haskell W, Hurley S, Janssen D, Johnson W, Lennartz S, Liu S, Palevsky H, Rahman S, Ray D, Sarkar A, Steiner Z, Widner B, Yang B.** 2017. Perspectives on Chemical Oceanography in the 21st century: Participants of the COME ABOARD Meeting examine aspects of the field in the context of 40 years of DISCO. *Mar Chem* 196 (February):181–190. doi: [10.1016/j.marchem.2017.09.002](https://doi.org/10.1016/j.marchem.2017.09.002).
18. **Durham BP, Dearth SP, Sharma S, Amin SA, Smith CB, Campagna SR, Armbrust EV, Moran MA.** 2017. Recognition cascade and metabolite transfer in a marine bacteria-phytoplankton model system. *Environ Microbiol* 19 (9):3500–3513.
19. **Kujawinski EB, Longnecker K, Alexander H, Dyhrman ST, Fiore CL, Haley ST, Johnson WM.** 2017. Phosphorus availability regulates intracellular nucleotides in marine eukaryotic phytoplankton. *Limnol Oceanogr Lett* 2 (4):119–129.
20. **Heal KR, Kellogg NA, Carlson LT, Lionheart RM, Ingalls AE.** 2019. Metabolic Consequences of Cobalamin Scarcity in the Diatom *Thalassiosira pseudonana* as Revealed Through Metabolomics. *Protist* 170 (3):328–348. doi: [10.1016/j.protis.2019.05.004](https://doi.org/10.1016/j.protis.2019.05.004).
21. **Dawson HM, Heal KR, Boysen AK, Carlson LT, Ingalls AE, Young JN.** 2020. Potential of temperature- and salinity-driven shifts in diatom compatible solute concentrations to impact biogeochemical cycling within sea ice. *Elem Sci Anthropocene* 8:25.
22. **Muratore D, Boysen AK, Harke MJ, Becker KW, Casey JR, Coesel SN, Mende DR, Wilson ST, Aylward FO, Eppley JM, Visolova A, Peng S, Rodriguez-Gonzalez RA, Beckett SJ, Armbrust EV, DeLong EF, Karl DM, White AE, Zehr JP, Van Mooy BAS, Dyhrman ST, Ingalls AE, Weitz JS.** 2020. Community-scale synchronization and temporal partitioning of gene expression, metabolism, and lipid biosynthesis in oligotrophic ocean surface waters. bioRxiv doi: [10.1101/2020.05.15.098020](https://doi.org/10.1101/2020.05.15.098020).
23. **Johnson WM, Longnecker K, Kido Soule MC, Arnold WA, Bhattia MP, Hallam SJ, Van Mooy BAS, Kujawinski EB.** 2020. Metabolite composition of sinking particles differs from surface suspended particles across a latitudinal transect in the South Atlantic. *Limnol Oceanogr* 65 (1):111–127. doi: [10.1002/lno.11255](https://doi.org/10.1002/lno.11255).
24. **Llewellyn CA, Sommer U, Dupont CL, Allen AE, Viant MR.** 2015. Using community metabolomics as a new approach to discriminate marine microbial particulate organic matter in the western English Channel. *Prog Oceanogr* 137:421–433. doi: [10.1016/j.pocean.2015.04.022](https://doi.org/10.1016/j.pocean.2015.04.022).
25. **Petras D, Koester I, Da Silva R, Stephens BM, Haas AF, Nelson CE, Kelly LW, Aluwihare LI, Dorrestein PC.** 2017. High-resolution liquid chromatography tandem mass spectrometry enables large scale molecular characterization of dissolved organic matter. *Front Mar Sci* 4. doi: [10.3389/fmars.2017.00405](https://doi.org/10.3389/fmars.2017.00405).
26. **Roden GI.** 1991. Subarctic-subtropical transition zone of the North Pacific: Large-scale aspects and mesoscale structure. *NOAA Tech Rep NMFS* p 1–38.
27. **Gradoville MR, Farnelid H, White AE, Turk-kubo KA, Stewart B, Ribalet F, Ferrón S, Pinedo-gonzalez P, Armbrust EV, Karl DM, John S, Zehr JP.** 2020. Latitudinal constraints on the abundance and activity of the cyanobacterium UCYN-A and other marine diazotrophs in the North Pacific. *Limnol Oceanogr* p 1–18. doi: [10.1002/lno.11423](https://doi.org/10.1002/lno.11423).
28. **Polovina JJ, Howell EA, Kobayashi DR, Seki MP.** 2017. The transition zone chlorophyll front updated: Advances from a decade of research. *Prog Oceanogr* 150:79–85.
29. **Juranek LW, Quay PD, Feely RA, Lockwood D, Karl DM, Church MJ.** 2012. Biological production in the NE Pacific and its influence on air-sea CO<sub>2</sub> flux: Evidence from dissolved oxygen isotopes and O<sub>2</sub>/Ar. *J Geophys Res Ocean* 117 (5):1–23.
30. **Klähn S, Steglich C, Hess WR, Hagemann M.** 2010. Glucosylglycerate: A secondary compatible solute common to marine cyanobacteria from nitrogen-poor environments. *Environ Microbiol* 12 (1):83–94. doi: [10.1111/j.1462-2920.2009.02045.x](https://doi.org/10.1111/j.1462-2920.2009.02045.x).
31. **Van Mooy BAS, Fredricks HF.** 2010. Bacterial and eukaryotic intact polar lipids in the eastern subtropical South Pacific: Water-column distribution, planktonic sources, and fatty acid composition. *Geochimica et Cosmochimica Acta* 74 (22):6499–6516. doi: [10.1016/j.gca.2010.08.026](https://doi.org/10.1016/j.gca.2010.08.026).
32. **Robertson DE, Roberts MF, Belay N, Stetter KO, Boone DR.**

Community metabolomics

1990. Occurrence of  $\beta$ -glutamate, a novel osmolyte, in marine methanogenic bacteria. *Appl Environ Microbiol* 56 (5):1504–1508. doi: [10.1128/aem.56.5.1504-1508.1990](https://doi.org/10.1128/aem.56.5.1504-1508.1990).
33. **Robertson DE, Lesage S, Roberts MF.** 1989.  $\beta$ -aminoglutaric acid is a major soluble component of *Methanococcus thermolithotrophicus*. *BBA - Gen Subj* 992 (3):320–326. doi: [10.1016/0304-4165\(89\)90091-3](https://doi.org/10.1016/0304-4165(89)90091-3).
34. **Karner MB, DeLong EF, Karl DM.** 2001. Archaeal dominance in the mesopelagic zone of the Pacific Ocean. *Nature* 409:507–510.
35. **Duncan EG, Maher WA, Foster SD.** 2015. Contribution of arsenic species in unicellular algae to the cycling of arsenic in marine ecosystems. *Environ Sci Technol* 49 (1):33–50. doi: [10.1021/es504074z](https://doi.org/10.1021/es504074z).
36. **Wilson ST, Aylward FO, Ribalet F, Barone B, Casey JR, Connell PE, Eppley JM, Ferron S, Fitzsimmons JN, Hayes CT, Romano AE, Turk-Kubo KA, Vislova A, Virginia Armbrust E, Caron DA, Church MJ, Zehr JP, Karl DM, De Long EF.** 2017. Coordinated regulation of growth, activity and transcription in natural populations of the unicellular nitrogen-fixing cyanobacterium *Crocospaera*. *Nat Microbiol* 2:1–9. doi: [10.1038/nmicrobiol.2017.118](https://doi.org/10.1038/nmicrobiol.2017.118).
37. **Lee C, Wakeham S, Arnosti C.** 2004. Particulate organic matter in the sea: The composition conundrum. *Ambio* 33 (8):565–575. doi: [10.1579/0044-7447-33.8.565](https://doi.org/10.1579/0044-7447-33.8.565).
38. **Keller MD, Matrai PA, Kiene RP, Bellows WK.** 2004. Responses of coastal phytoplankton populations to nitrogen additions: dynamics of cell-associated dimethylsulfoniopropionate (DMSP), glycine betaine (GBT), and homarine. *Can J Fish Aquat Sci* 61 (5):685–699. doi: [10.1139/f04-058](https://doi.org/10.1139/f04-058).
39. **Perchat N, Saaidi PL, Darii E, Pellé C, Petit JL, Besnard-Gonnet M, de Berardinis V, Dupont M, Gimbernat A, Salanoubat M, Fischer C, Perret A.** 2018. Elucidation of the trigonelline degradation pathway reveals previously undescribed enzymes and metabolites. *Proc Natl Acad Sci United States Am* 115 (19):E4358–E4367. doi: [10.1073/pnas.1722368115](https://doi.org/10.1073/pnas.1722368115).
40. **Dawson HM, Heal KR, Torstensson A, Carlson LT, Ingalls A, Young JN.** sep 2020. Large diversity in nitrogen- and sulfur-containing compatible solute profiles in polar and temperate diatoms. *Integr Comp Biol* doi: [10.1093/icb/icaa133](https://doi.org/10.1093/icb/icaa133).
41. **Keller MD, Kiene RP, Matrai PA, Bellows WK.** 1999. Production of glycine betaine and dimethylsulfoniopropionate in marine phytoplankton. I. Batch cultures. *Mar Biol* 135 (2):237–248. doi: [10.1007/s002270050621](https://doi.org/10.1007/s002270050621).
42. **Keller MD, Kiene RP, Matrai PA, Bellows WK.** 1999. Production of glycine betaine and dimethylsulfoniopropionate in marine phytoplankton. II. N-limited chemostat cultures. *Mar Biol* 135 (2):249–257. doi: [10.1007/s002270050622](https://doi.org/10.1007/s002270050622).
43. **Gebser B, Pohnert G.** 2013. Synchronized regulation of different zwitterionic metabolites in the osmoadaptation of phytoplankton. *Mar Drugs* 11 (6):2168–2182. doi: [10.3390/md11062168](https://doi.org/10.3390/md11062168).
44. **Fenzia S, Thume K, Wirgenings M, Pohnert G.** 2020. Ectoine from bacterial and algal origin is a compatible solute in microalgae. *Mar Drugs* 18 (1):1–13. doi: [10.3390/md18010042](https://doi.org/10.3390/md18010042).
45. **Flombaum P, Gallegos JL, Gordillo RA, Rincón J, Zabala LL, Jiao N, Karl DM, Li WKW, Lomas MW, Veneziano D, Vera CS, Vrugt JA, Martiny AC.** 2013. Present and future global distributions of the marine Cyanobacteria *Prochlorococcus* and *Synechococcus*. *Proc Natl Acad Sci United States Am* 110 (24):9824–9829. doi: [10.1073/pnas.1307701110](https://doi.org/10.1073/pnas.1307701110).
46. **Ashihara H.** 2008. Trigonelline (N-methylnicotinic acid) biosynthesis and its biological role in plants. *Nat Prod Commun* 3 (9):1423–1428.
47. **Hall ER, Gurin S.** 1975. Experiments in marine biochemistry: Homarine metabolism in *Penaeus Durarum*. *The J Biol Chem* 250 (17):6943–6946.
48. **Spielmeier A, Pohnert G.** 2010. Direct quantification of dimethylsulfoniopropionate (DMSP) with hydrophilic interaction liquid chromatography/mass spectrometry. *J Chromatogr B: Anal Technol Biomed Life Sci* 878 (31):3238–3242. doi: [10.1016/j.jchromb.2010.09.031](https://doi.org/10.1016/j.jchromb.2010.09.031).
49. **Nakamura H, Fujimaki K, Sampei O, Murai A.** 1993. Gonyol: Methionine-induced sulfonium accumulation in a dinoflagellate *Gonyaulax polyedra*. *Tetrahedron Lett* 34 (52):8481–8484. doi: [10.1016/S0040-4039\(00\)61364-3](https://doi.org/10.1016/S0040-4039(00)61364-3).
50. **Gebser B, Thume K, Schiller F, Steinke M, Pohnert G.** 2020. Phytoplankton-derived zwitterionic gonyol and dimethylsulfoniacetate interfere with microbial dimethylsulfoniopropionate sulfur cycling. *MicrobiologyOpen* 9:1–14. doi: [10.1002/mbo3.1014](https://doi.org/10.1002/mbo3.1014).
51. **Ksionzek KB, Lechtenfeld OJ, McCallister SL, Schmitt-Kopplin P, Geuer JK, Geibert W, Koch BP.** 2016. Dissolved organic sulfur in the ocean: Biogeochemistry of a petagram inventory. *Science* 354 (6311):456–459. doi: [10.1126/science.aam6328](https://doi.org/10.1126/science.aam6328).
52. **Moran MA, Durham BP.** 2019. Sulfur metabolites in the pelagic ocean. *Nat Rev Microbiol* 17 (11):665–678. doi: [10.1038/s41579-019-0250-1](https://doi.org/10.1038/s41579-019-0250-1).
53. **Azam F.** 1998. Microbial control of oceanic carbon flux: The plot thickens. *Science* 280:694–696.
54. **Azam F, Malfatti F.** 2007. Microbial structuring of marine ecosystems. *Nat Rev Microbiol* 5 (10):782–791. doi: [10.1038/nrmicro1747](https://doi.org/10.1038/nrmicro1747).
55. **Qin W, Heal KR, Ramdasi R, Kobelt JN, Martens-Habbena W, Bertagnolli AD, Amin SA, Walker CB, Urakawa H, Könneke M, Devol AH, Moffett JW, Armbrust EV, Jensen GJ, Ingalls AE, Stahl DA.** 2017. *Nitrosopumilus maritimus* gen. nov., sp. nov., *Nitrosopumilus cobalaminogenes* gen. nov., sp. nov., *Nitrosopumilus oxycliniae* gen. nov., sp. nov., and *Nitrosopumilus ureaphilus* gen. nov., sp. nov., four marine ammonia-oxidizing archaea of the phylum Thaumarc. *Int J Syst Evol Microbiol* 67 (12):5067–5079.
56. **Strickland JDH, Parsons TR.** 1972. A practical handbook of seawater analysis. .
57. **Qin W, Amin SA, Martens-Habbena W, Walker CB, Urakawa H, Devol AH, Ingalls AE, Moffett JW, Armbrust EV, Stahl DA.** 2014. Marine ammonia-oxidizing archaeal isolates display obligate mixotrophy and wide ecotypic variation. *Proc Natl Acad Sci United States Am* 111:12504–12509. [internal-pdf://189.27.88.170/PNAS-2014-Qin-12504.pdf](https://doi.org/10.1073/pnas.2014-12504.pdf).
58. **Urakawa H, Martens-Habbena W, Stahl DA.** 2011. Physiology and genomics of ammonia-oxidizing archaea. *Nitrification* p 115–155.
59. **Menden-Deuer S, Lessard EJ.** 2000. Carbon to volume relationships for dinoflagellates, diatoms, and other protist plankton. *Limnol Oceanogr* 45 (3):569–579. doi: [10.4319/lo.2000.45.3.0569](https://doi.org/10.4319/lo.2000.45.3.0569).
60. **Ribalet F, Berthiaume C, Hynes A, Swallow J, Carlson M, Clayton S, Hennon G, Poirier C, Shimabukuro E, White A, Armbrust EV.** 2019. SeaFlow data v1, high-resolution abundance, size and biomass of small phytoplankton in the North Pacific. *Sci data* 6 (1):277. doi: [10.1038/s41597-019-0292-2](https://doi.org/10.1038/s41597-019-0292-2).
61. **Dron A, Rabouille S, Clauquin P, Le Roy B, Talec A, Sciandra A.** 2012. Light-dark (12:12) cycle of carbon and nitrogen metabolism in *Crocospaera watsonii* WH8501: Relation to the cell cycle. *Environ Microbiol* 14 (4):967–981. doi: [10.1111/j.1462-2920.2011.02675.x](https://doi.org/10.1111/j.1462-2920.2011.02675.x).
62. **Zhang Y, Qin W, Hou L, Zakem EJ, Wan X, Zhao Z, Liu L, Hunt KA, Jiao N, Kao SJ, Tang K, Xie X, Shen J, Li Y, Chen M, Dai X, Liu C, Deng W, Dai M, Ingalls AE, Stahl DA, Herndl GJ.** 2020. Nitrifier adaptation to low energy flux controls inventory of reduced nitrogen in the dark ocean. *Proc Natl Acad Sci United States Am* 117 (9):4823–4830. doi: [10.1073/pnas.1912367117](https://doi.org/10.1073/pnas.1912367117).
63. **Juranek LW, White AE, Dugenne M, Henderikx Freitas F,**



Heal et al.

- Dutkiewicz S, Ribalet F, Ferrón S, Armbrust EV, Karl DM.** 2020. The Importance of the Phytoplankton 'Middle Class' to Ocean Net Community Production. *Glob Biogeochem Cycles* doi: [10.1029/2020gb006702](https://doi.org/10.1029/2020gb006702).
64. **Bidigare RR, Van Heukelem L, Trees CC.** 2005. Analysis of algal pigments by high-performance liquid chromatography, p 327–345. *In* Andersen RA (ed), *Algal culturing techniques*. Academic Press.
65. **Chambers MC, Maclean B, Burke R, Amodei D, Ruderman DL, Neumann S, Gatto L, Fischer B, Pratt B, Egertson J, Hoff K, Kessner D, Tasman N, Shulman N, Frewen B, Baker TA, Brusniak MY, Paulse C, Creasy D, Flashner L, Kani K, Moulding C, Seymour SL, Nuwaysir LM, Lefebvre B, Kuhlmann F, Roark J, Rainer P, Detlev S, Hemenway T, Huhmer A, Langridge J, Connolly B, Chadick T, Holly K, Eckels J, Deutsch EW, Moritz RL, Katz JE, Agus DB, MacCoss M, Tabb DL, Mallick P.** 2012. A cross-platform toolkit for mass spectrometry and proteomics. *Nat Biotechnol* 30 (10):918–920.
66. **Benton HP, Want EJ, Ebbels TMD.** 2010. Correction of mass calibration gaps in liquid chromatography–mass spectrometry metabolomics data. *Bioinformatics* 26 (19):2488–2489.
67. **Smith CA, Want EJ, O'Maille G, Abagyan R, Siuzdak G.** 2006. XCMS: Processing mass spectrometry data for metabolite profiling using nonlinear peak alignment, matching, and identification. *Anal Chem* 78 (3):779–787.
68. **Tautenhahn R, Böttcher C, Neumann S.** 2008. Highly sensitive feature detection for high resolution LC/MS. *BMC Bioinform* 9 (1):504.
69. **Pino LK, Searle BC, Bollinger JG, Nunn B, Maclean B, Maccoss MJ.** 2017. The Skyline ecosystem: Informatics for quantitative mass spectrometry proteomics. *Mass Spectrom Rev* 39 (3):229–244. doi: [10.1002/mas.21540](https://doi.org/10.1002/mas.21540).
70. **Schiffman C, Petrick L, Perttula K, Yano Y, Carlsson H, Whitehead T, Metayer C, Hayes J, Rappaport S, Dudoit S.** 2019. Filtering procedures for untargeted lc-ms metabolomics data. *BMC Bioinform* 20 (1):1–10. doi:[10.1186/s12859-019-2871-9](https://doi.org/10.1186/s12859-019-2871-9).
71. **Sumner LW, Amberg A, Barrett D, Beale MH, Beger R, Daykin CA, Fan TWM, Fiehn O, Goodacre R, Griffin JL, Hankemeier T, Hardy N, Harnly J.** 2007. Proposed minimum reporting standards for chemical analysis Chemical Analysis Working Group (CAWG) Metabolomics Standards Initiative (MSI). *Metabolomics* 3:211–221.
72. **Horai H, Arita M, Kanaya S, Nihei Y, Ikeda T, Suwa K, Ojima Y, Tanaka K, Tanaka S, Aoshima K, Oda Y, Kakazu Y, Kusano M, Tohge T, Matsuda F, Sawada Y, Hirai MY, Nakanishi H, Ikeda K, Aki-moto N, Maoka T, Takahashi H, Ara T, Sakurai N, Suzuki H, Shibata D, Neumann S, Iida T, Tanaka K, Funatsu K, Matsuura F, Soga T, Taguchi R, Saito K, Nishioka T.** 2010. MassBank: A public repository for sharing mass spectral data for life sciences. *J. Mass Spectrom.* 45 (7):703–714.
73. **Wang M, Carver JJ, Phelan VV, Sanchez LM, Garg N, Peng Y, Nguyen DD, Watrous J, Kapono CA, Luzzatto-Knaan T, Porto C, Bouslimani A, Melnik AV, Meehan MJ, Liu WT, Crüsemann M, Boudreau PD, Esquenazi E, Sandoval-Calderón M, Kersten RD, Pace LA, Quinn RA, Duncan KR, Hsu CC, Floros DJ, Gavilan RG, Kleigrewe K, Northen T, Dutton RJ, Parrot D, Carlson EE, Aigle B, Michelsen CF, Jelsbak L, Sohlenkamp C, Pevzner P, Edlund A, McLean J, Piel J, Murphy BT, Gerwick L, Liaw CC, Yang YL, Humpf HU, Maansson M, Keyzers RA, Sims AC, Johnson AR, Sidebottom AM, Sedio BE, Klitgaard A, Larson CB, Boya CAP, Torres-Mendoza D, Gonzalez DJ, Silva DB, Marques LM, Demarque DP, Pociute E, O'Neill EC, Briand E, Helfrich EJM, Granatosky EA, Glukhov E, Ryffel F, Houson H, Mohimani H, Kharbush JJ, Zeng Y, Vorholt JA, Kurita KL, Charusanti P, McPhail KL, Nielsen KF, Vuong L, Elfeki M, Traxler MF, Engene N, Koyama N, Vining OB, Baric R, Silva RR, Mascuch SJ, Tomasi S, Jenkins S, Macherla V, Hoffman T, Agarwal V, Williams PG, Dai J, Neupane R, Gurr J, Rodríguez AMC, Lamsa A, Zhang C, Dorrestein K, Duggan BM, Almaliti J, Allard PM, Phapale P, Nothias LF, Alexandrov T, Litaudon M, Wolfender JL, Kyle JE, Metz TO, Peryea T, Nguyen DT, VanLeer D, Shinn P, Jadhav A, Müller R, Waters KM, Shi W, Liu X, Zhang L, Knight R, Jensen PR, Palsson B, Pogliano K, Linington RG, Gutiérrez M, Lopes NP, Gerwick WH, Moore BS, Dorrestein PC, Bandeira N.** 2016. Sharing and community curation of mass spectrometry data with Global Natural Products Social Molecular Networking. *Nat Biotechnol* 34 (8):828–837.
74. **Vaniya A, Fiehn O.** 2015. Using fragmentation trees and mass spectral trees for identifying unknown compounds in metabolomics. *Trends Anal Chem* 69:52–61.
75. **Sawada Y, Nakabayashi R, Yamada Y, Suzuki M, Sato M, Sakata A, Akiyama K, Sakurai T, Matsuda F, Aoki T, Hirai MY, Saito K.** 2012. RIKEN tandem mass spectral database (ReSpect) for phytochemicals: A plant-specific MS/MS-based data resource and database. *Phytochem.* 82:38–45.
76. **Wishart DS, Tzur D, Knox C, Eisner R, Guo AC, Young N, Cheng D, Jewell K, Arndt D, Sawhney S, Fung C, Nikolai L, Lewis M, Coutouly MA, Forsythe I, Tang P, Shrivastava S, Jeroncic K, Stothard P, Amegbey G, Block D, Hau DD, Wagner J, Miniaci J, Clements M, Gebremedhin M, Guo N, Zhang Y, Duggan GE, MacInnis GD, Weljie AM, Dowlatabadi R, Bamforth F, Clive D, Greiner R, Li L, Marrie T, Sykes BD, Vogel HJ, Querengesser L.** 2007. HMDB: The human metabolome database. *Nucleic Acids Res* 35 (SUPPL. 1):521–526.
77. **Kanehisa M, Sato Y, Kawashima M, Furumichi M, Tanabe M.** 2016. KEGG as a reference resource for gene and protein annotation. *Nucleic Acids Res* 44 (D1):D457–D462.
78. **Kanehisa M, Furumichi M, Tanabe M, Sato Y, Morishima K.** 2017. KEGG: New perspectives on genomes, pathways, diseases and drugs. *Nucleic Acids Res* 45 (D1):D353–D361.
79. **Saccenti E, Hoefsloot HCJ, Smilde AK, Westerhuis JA, Hendriks MMWB.** 2013. Reflections on univariate and multivariate analysis of metabolomics data. *Metabolomics* 10 (3):361–374.
80. **Kruskal JB, Wish M.** 1978. Multidimensional scaling, p 7–28. *In* Uslaner EM (ed), *Sage University Paper series on Quantitative Applications in the Social Sciences*, vol 07-011. Sage Publications, Beverly Hills and London.
81. **Clarke KR.** 1993. Non-parametric multivariate analyses of changes in community structure. *Aust J Ecol* 18:117–143.
82. **MacQueen J.** 1967. Some methods for classification and analysis of multivariate observations. *Proc fifth Berkeley symposium on mathematical statistics probability* 1 (14):281–297.



Community metabolomics

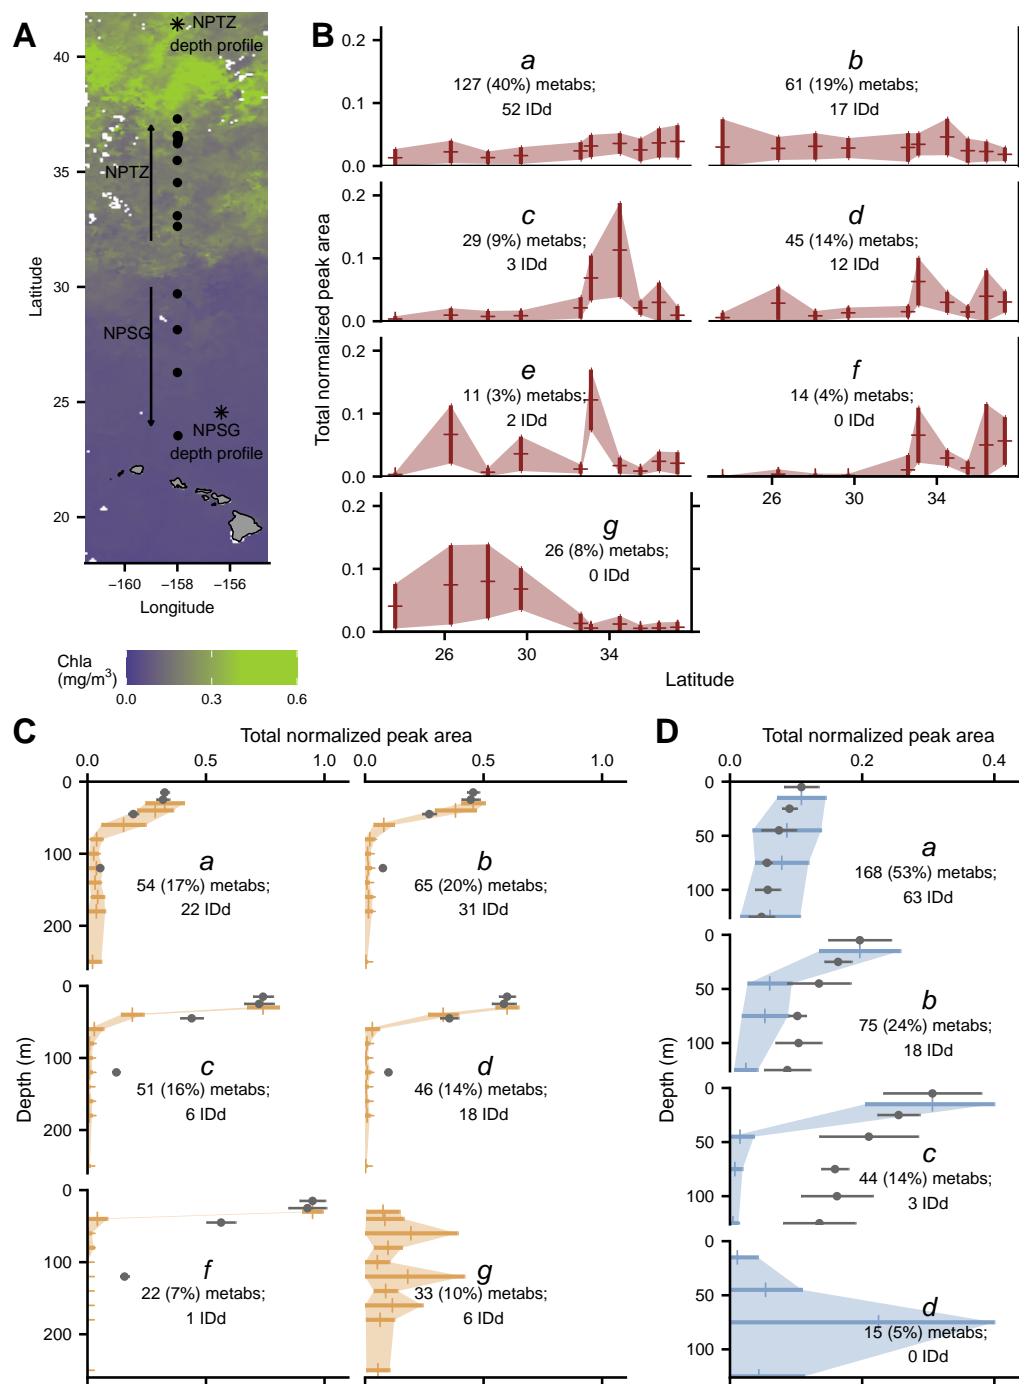

**FIG 1** Sampling location and metabolite patterns. Map of sample locations of transect samples (dot) and depth profiles (asterisks). Map is overlaid with satellite-derived (MODIS-Aqua) chlorophyll at 8 day, 9 km resolution over the time period of the transect sampling (A). Patterns of total normalized metabolite concentrations found in each environmental dataset grouped into modes as a result of *k*-medoids clustering, plotted as one standard deviation around the mean (B, meridional transect; C, NPTZ depth profile; D, NPSG depth profile). We have excluded modes with fewer than 10 compounds in each dataset. Maximum normalized bulk PC is plotted over depth profiles, with surface PC concentration plotted to match surface total normalized metabolite peak area in order to compare the shape of attenuation (excluded in modes that do not attenuate with depth), grey dots with error bars (standard deviation, often smaller than markers). Number of metabolites (metabs) and percent of metabolites assigned to each cluster is noted, as well as the number of compounds identified (IDd) in each cluster. Full results are presented in Table S5 with cluster assignments in Table S6.

Heal et al.

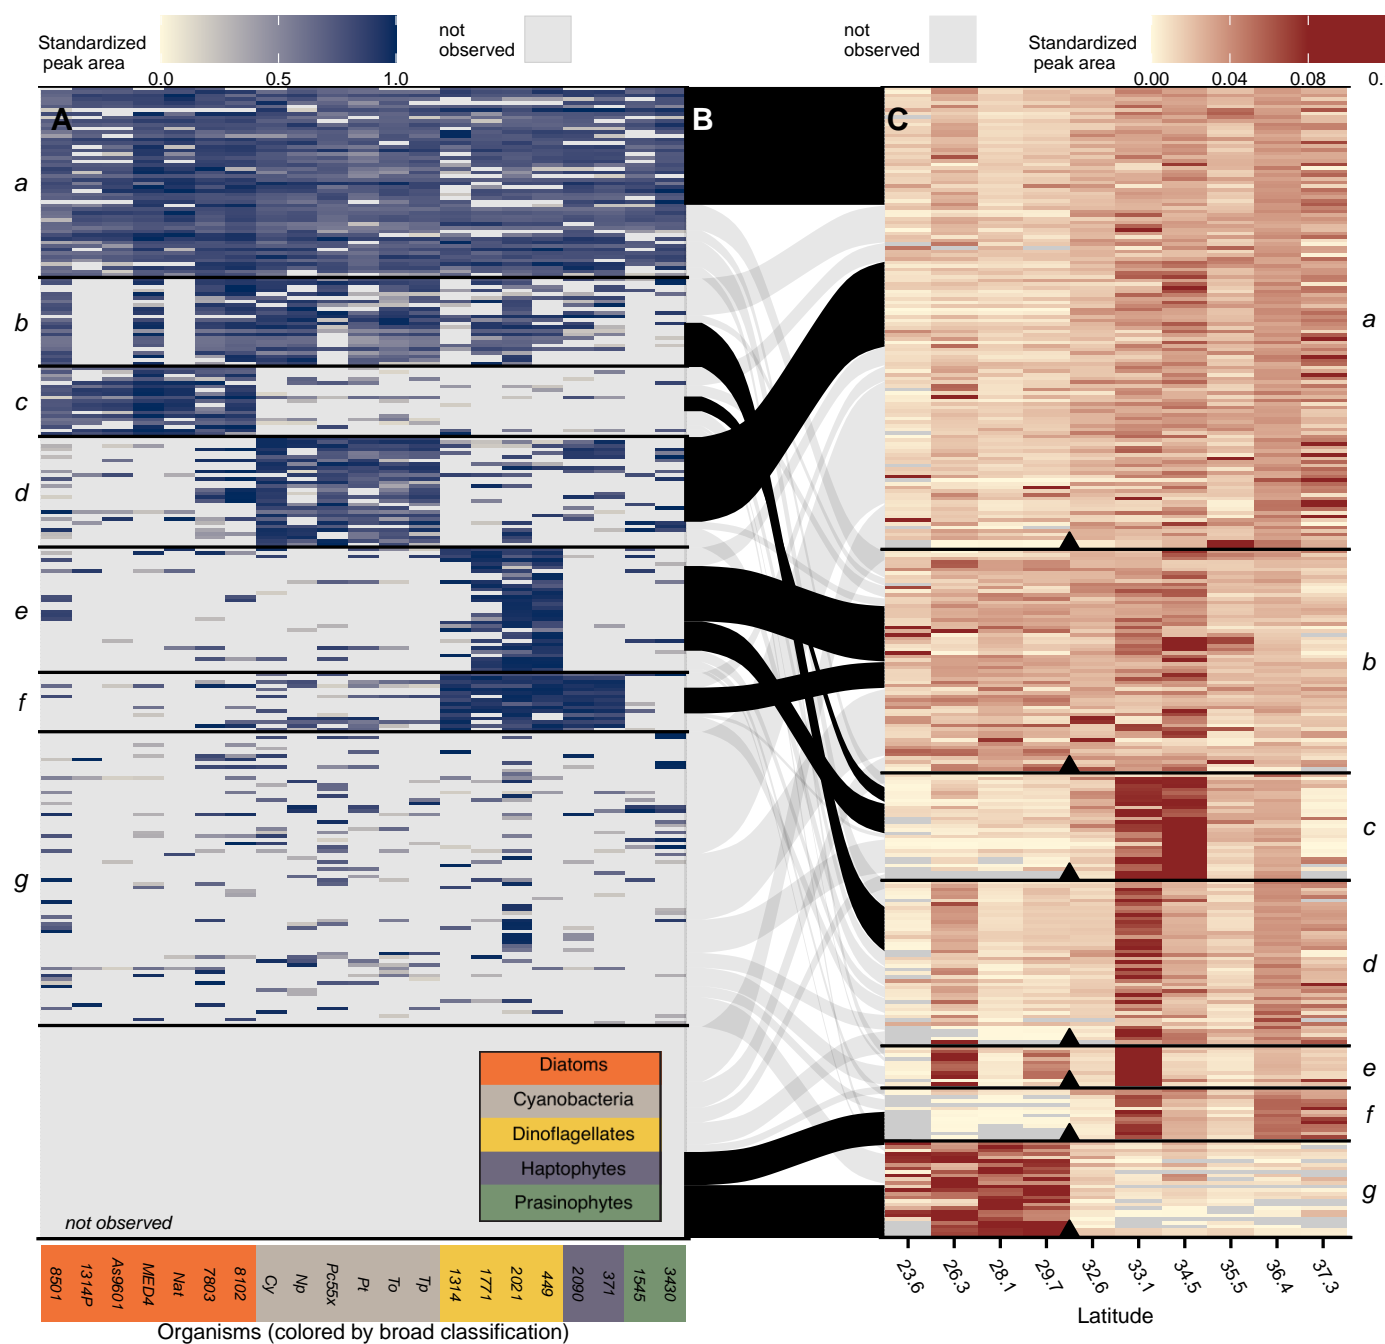

**FIG 2** Relative abundance patterns in environmental and culture metabolites. Each row is a metabolite — either identified or unknown. Left (A) is the standardized peak areas for metabolites in the culture data sets. Right (C) is the relative abundance between samples along the meridional transect. Tile panels are grouped separately using a  $k$ -medoids clustering and reordered within each mode for visual clarity. The middle panel (B) shows which metabolites are shared between the culture and environmental  $k$ -medoids derived modes, with over-enriched connections between modes shown in black ( $p < 0.05$  by bootstrap test) and remaining non-statistically significant connections shown in grey. Organisms are colored by broad taxonomic classification as shown in inset (orange = cyanobacteria, grey = diatoms, yellow = dinoflagellates, purple = haptophytes, green = prasinophytes).

Community metabolomics

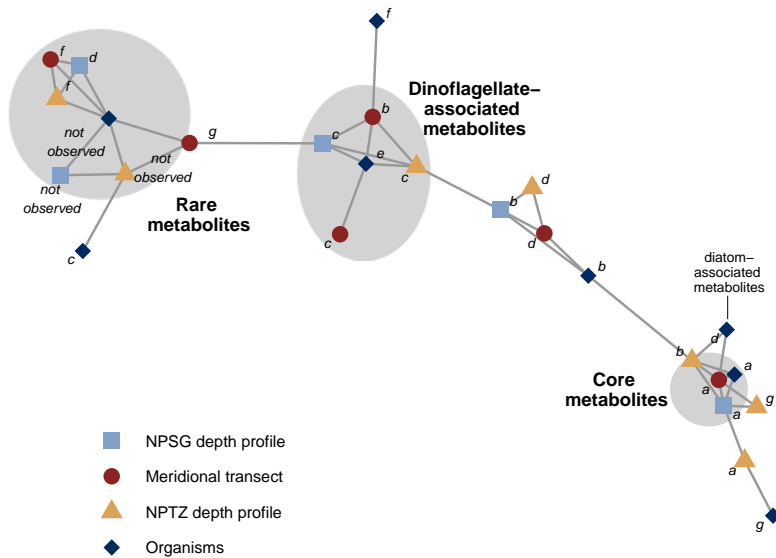

**FIG 3** Network visualization of significant overlap between data sets shown in a network visualization. Each mode in each data set is depicted as a node (colored and shaped by data set, labeled as in Figures 1 and 2). Meta-clusters are highlighted in grey and labeled as described in text. Edges are connections between modes that are over-enriched in the same compounds ( $p < 0.05$ ). Compound assignments to each mode and meta-cluster (if applicable) are found in Table S6.

Heal et al.

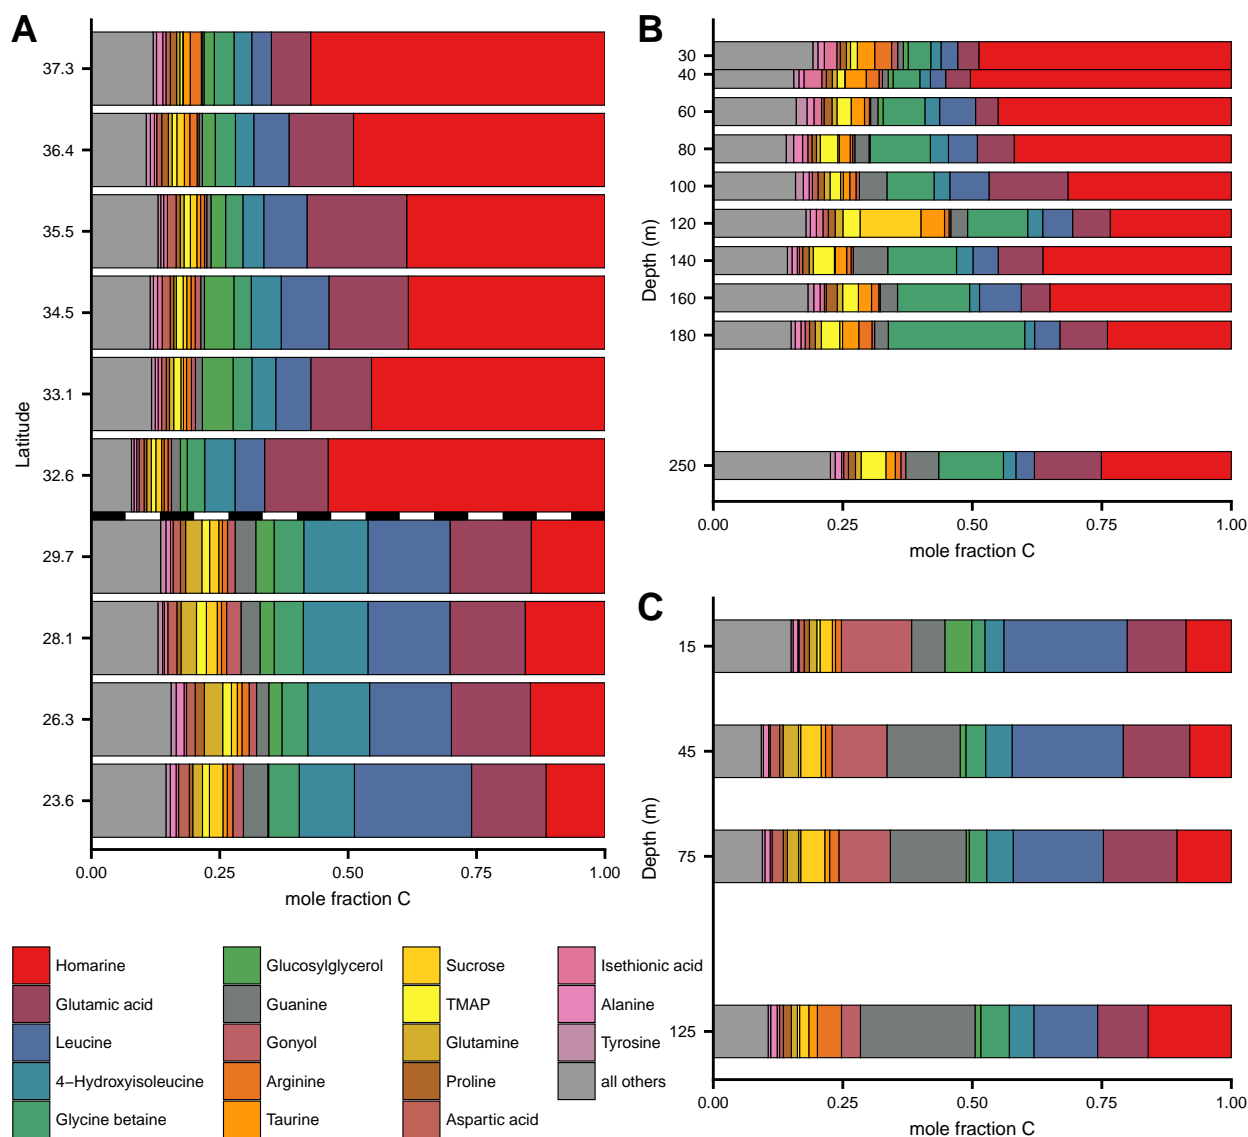

**FIG 4** Most abundant 18 metabolites in environmental samples, presented as mole fraction of carbon of total identified metabolites. Meridional transect (A), with transition between NPSG to NPTZ shown as dotted line. Depth profile from NPTZ (B), and NPSG (C). Locations of samples are shown in Figure 1. These same data are presented as nmol C per L in Figures S8; full results in Table S10. Note that the y axis on (A) is not in latitudinal space for easier viewing and we have excluded DMSP from this analysis.

Community metabolomics

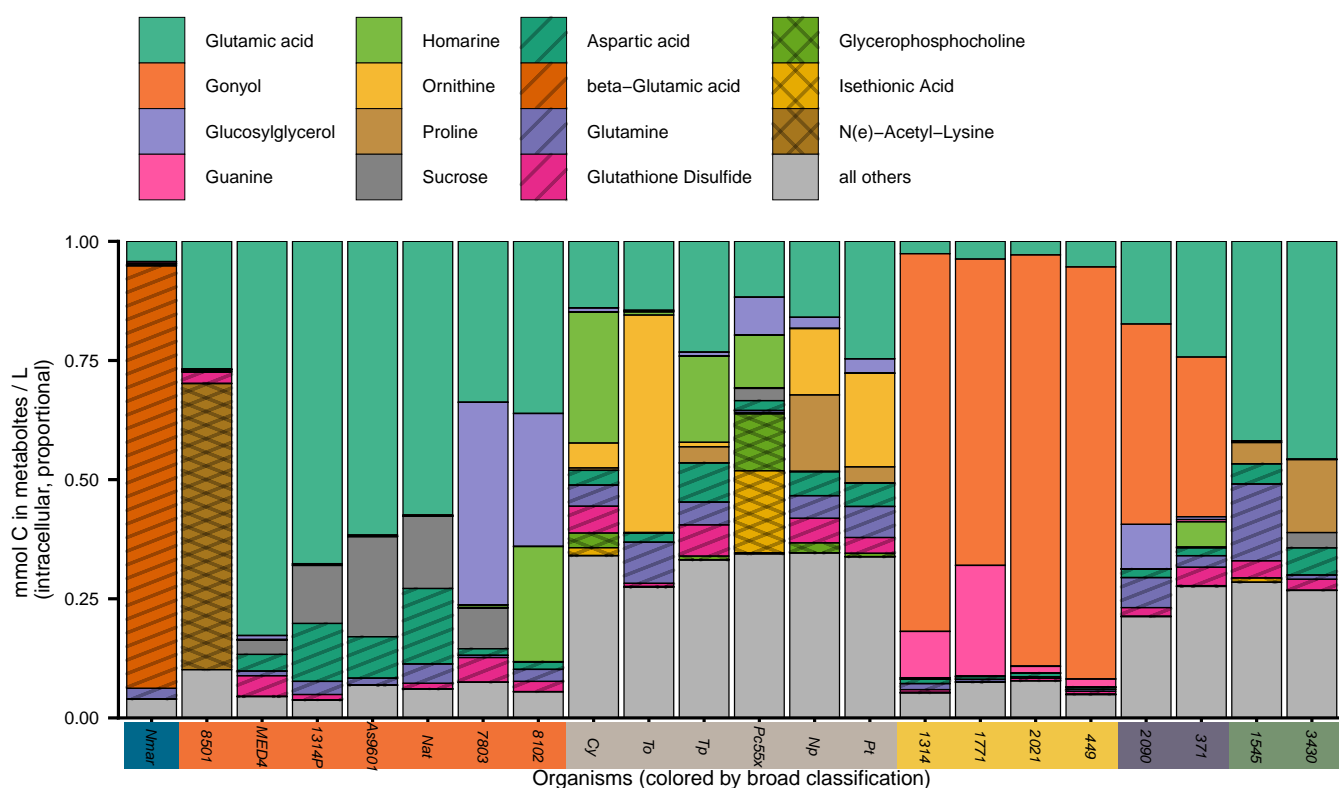

**FIG 5** Identified metabolites in culture samples, presented as mole fraction of carbon of total identified metabolites, with at least the most abundant two compounds highlighted; full results in Table S8. Organisms are colored by broad taxonomic classification (as in Figure 2, blue = archaea, orange = cyanobacteria, grey = diatoms, yellow = dinoflagellates, purple = haptophytes, green = prasinophytes) and full description of cultured organisms found in Tables S3 and S7, full data in Table S8. We have excluded DMSP from this analysis since we cannot accurately quantify it using our methodology. Patterns are for added clarity with differentiating compounds.



Heal et al.

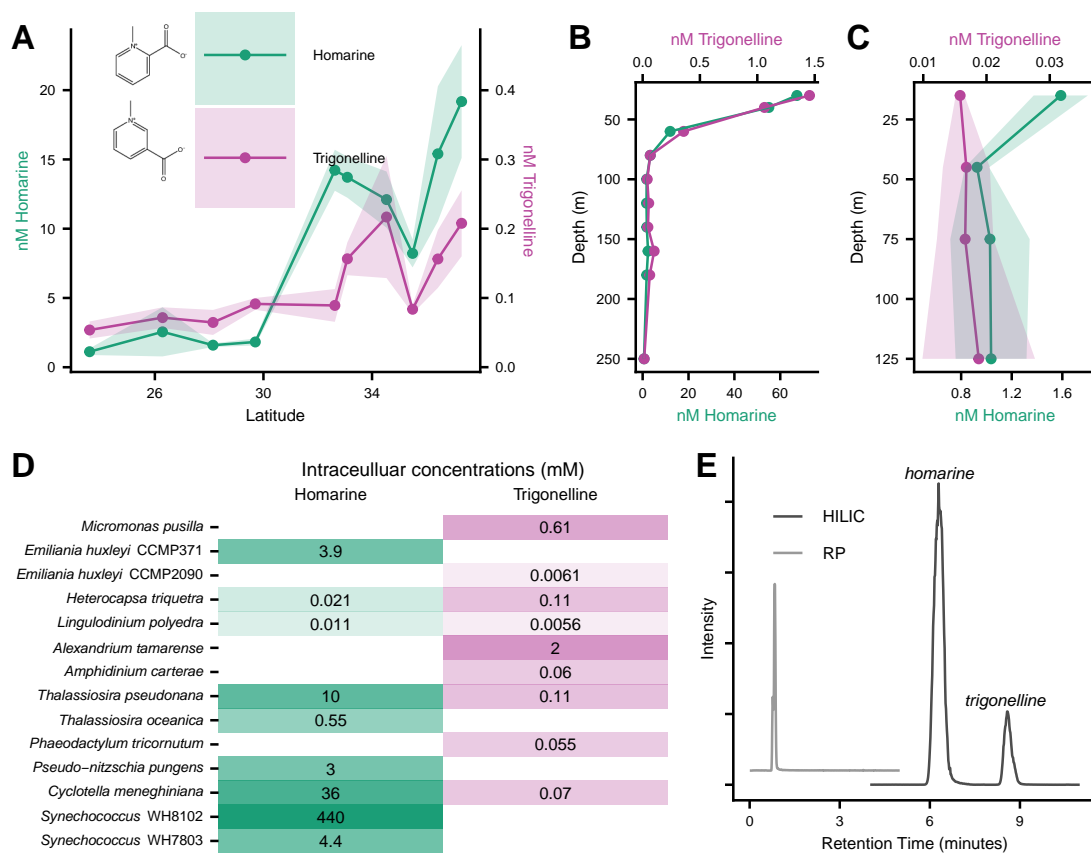

**FIG 6** Homarine and trigonelline spatial patterns in meridional transect (A), NPTZ depth profile (B), NPSG depth profile (C). Intracellular concentrations of homarine and trigonelline in relevant organisms (D). Chromatograms show the separation under HILIC chromatography but not RP (E). Note the different scales for trigonelline and homarine (panels A-C) and depth (panels B and C).

726 SUPPLEMENTAL FIGURES

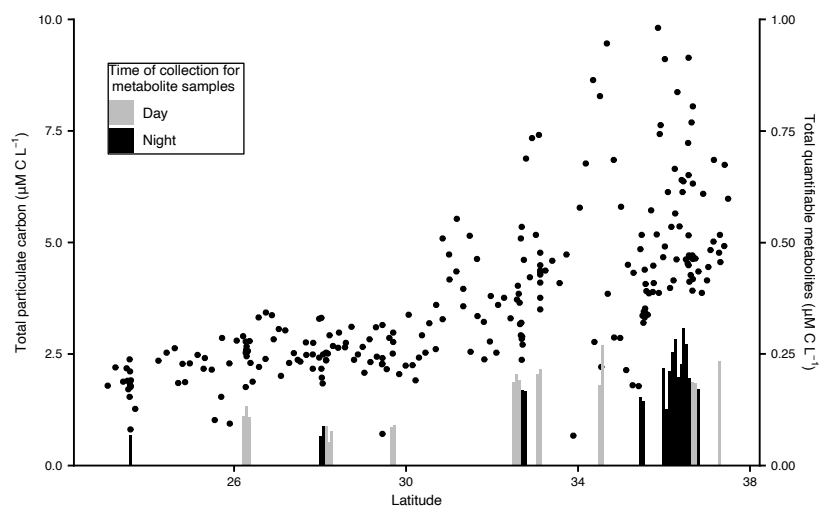

**FIG S1** Particulate carbon over the April 2016 transect (dots) and total quantifiable particulate metabolites (bars). Note that the total quantifiable metabolites are scaled at  $\times 10$  for visibility and dodged in latitude to show each individual replicate.

Heal et al.

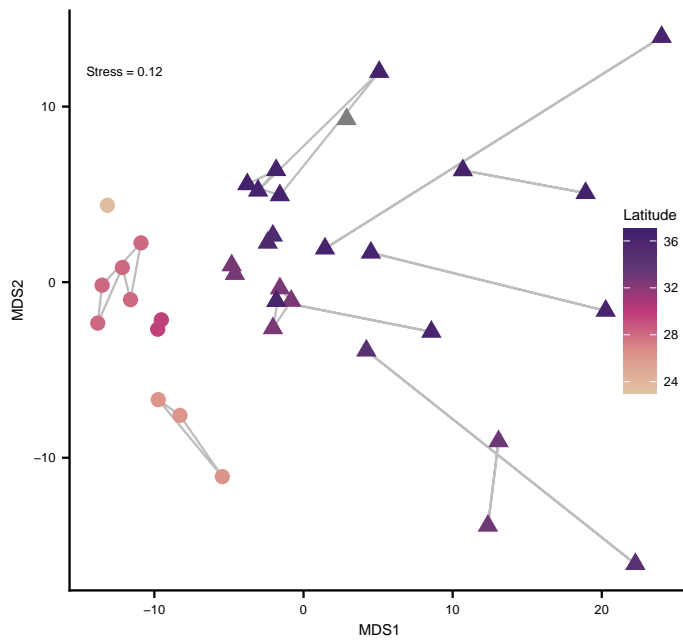

**FIG S2** Nonmetric multidimensional scaling comparison of metabolite composition on the KOK1606 transect,  $p < 0.01$  by Monte Carlo permutation. Colors are based on latitude of samples; biological replicates shown connected, with samples from NPSG in circles and NPTZ in triangles. This is based on euclidean distance between standardized adjusted peak areas.

Community metabolomics

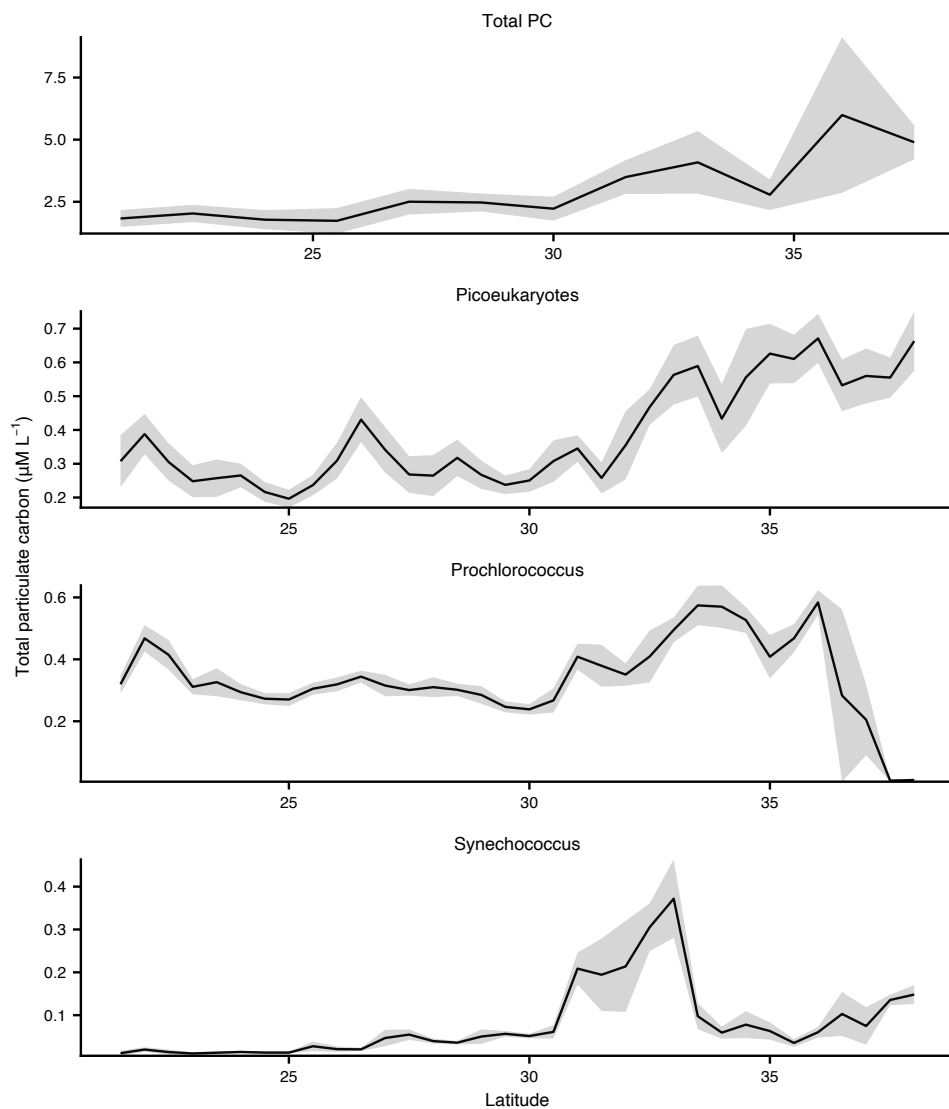

**FIG S3** Particulate carbon (total, and estimated by particular populations of phytoplankton as observed via underway flow cytometry (SeaFlow). Phytoplankton carbon are binned every 0.5 degree latitude, total PC binned every 1 degree latitude. Grey shading shows standard deviation. This is the northbound transect only.

Heal et al.

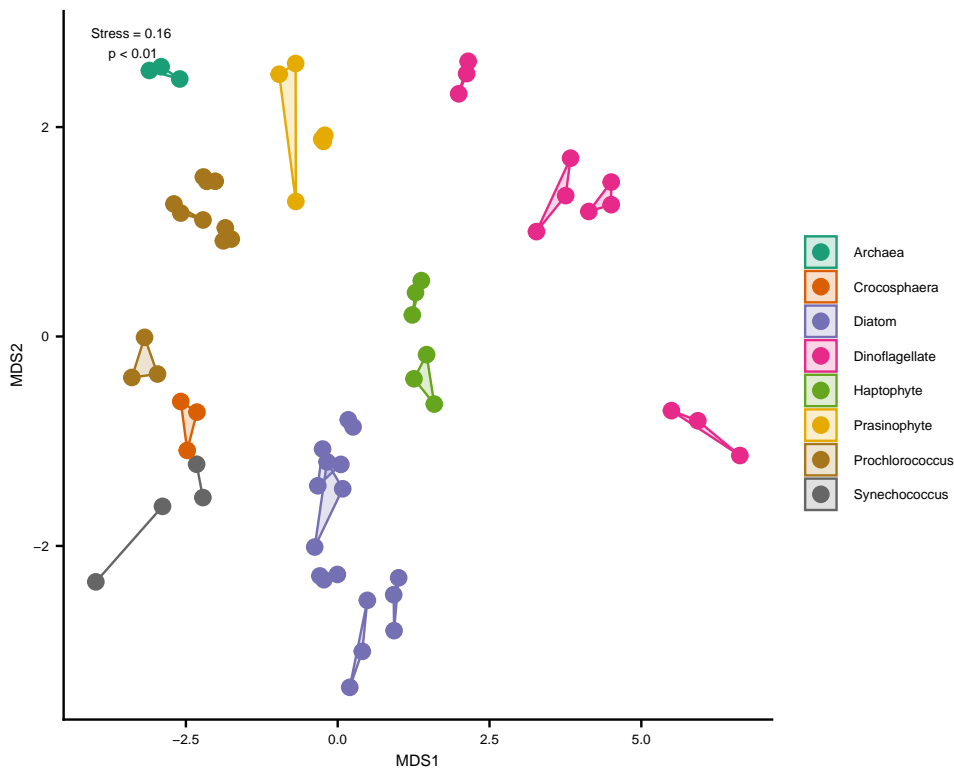

**FIG S4** Nonmetric multidimensional scaling comparison of metabolite profiles among the cultured organisms,  $p < 0.01$  by Monte Carlo permutation. Colors are based on broad taxonomic groups; biological replicates shown connected. This is based on euclidean distance between standardized adjusted peak areas.



Community metabolomics

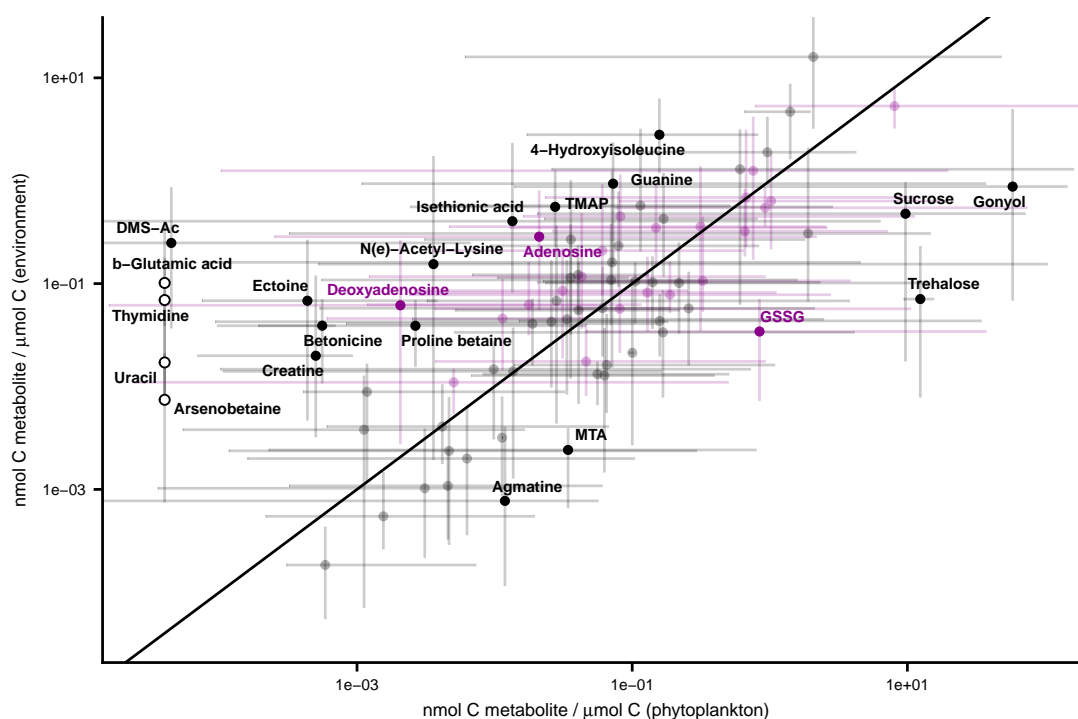

**FIG S5** All identified and quantified compounds. Each compound is shown as a dot with error bars, representing median observation and range of observations, respectively (excluding instances where we did not observe the compound), with 1:1 line plotted. Compounds that were not detected in phytoplankton are shown as open circles (x value is arbitrary). Compounds assigned to the "core" meta-cluster in Figure 3 are plotted in purple. Compounds are highlighted when median observation are ten times higher in either environmental sample set or the culture sample set (in carbon space). These values are also reported in Table S10. Note that both axes are in log<sub>10</sub> space.

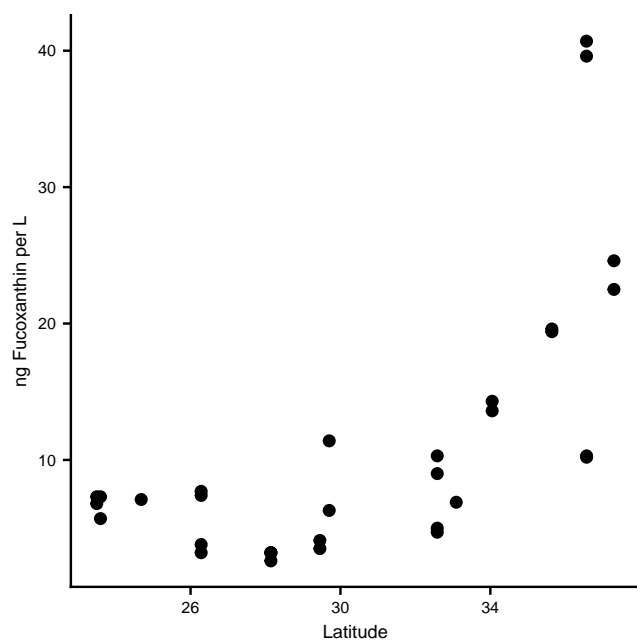

**FIG S6** Concentration of the pigment fucoxanthin over latitude in transect samples.

Heal et al.

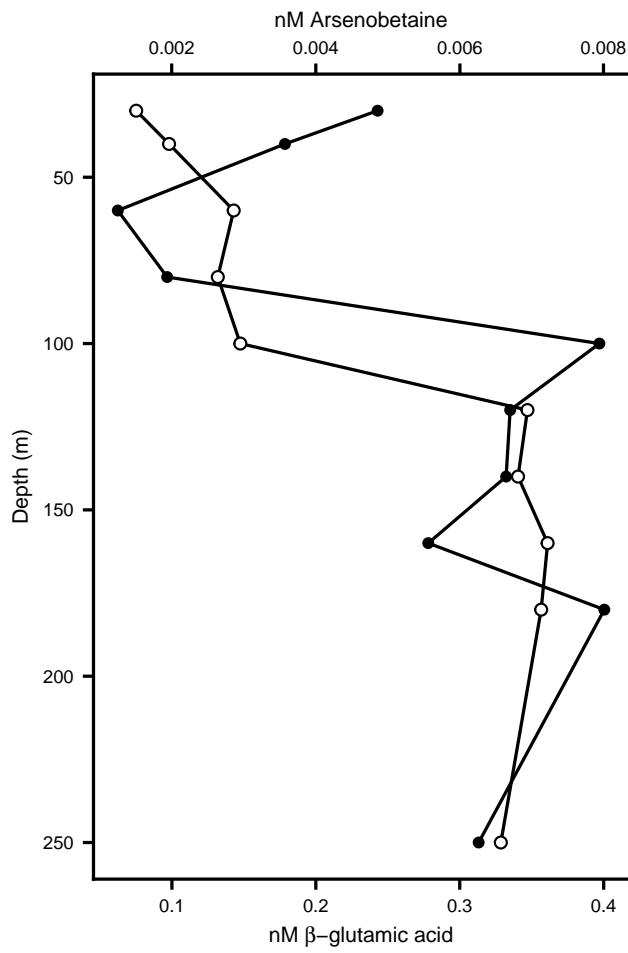

**FIG S7**  $\beta$ -glutamic acid (closed circles) and arsenobetaine (open circles) depth profiles from the NPTZ. Note the different scales.

Community metabolomics

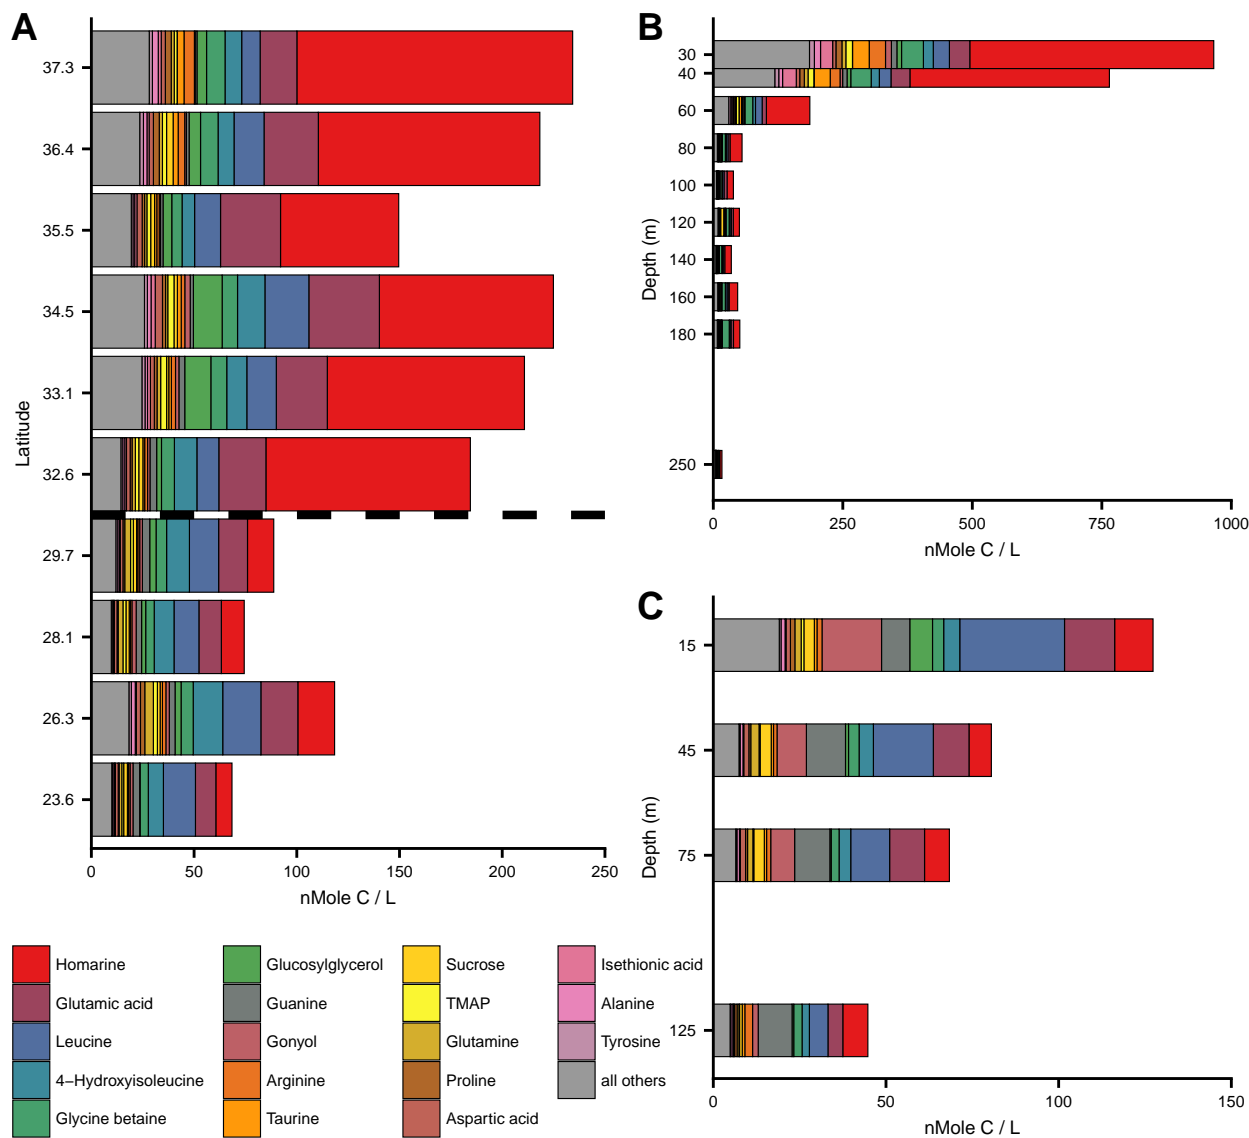

**FIG S8** Most abundant 18 metabolites in environmental samples, presented as a nmole carbon per L. Meridional transect (A), with transition between NPSG to NPTZ shown as dotted line. Depth profile from NPTZ (B), and NPSG (C). Locations of samples are shown in Figure 1. These same data are presented as carbon mole fraction in Figures 4; full results in Table S9.

Heal et al.

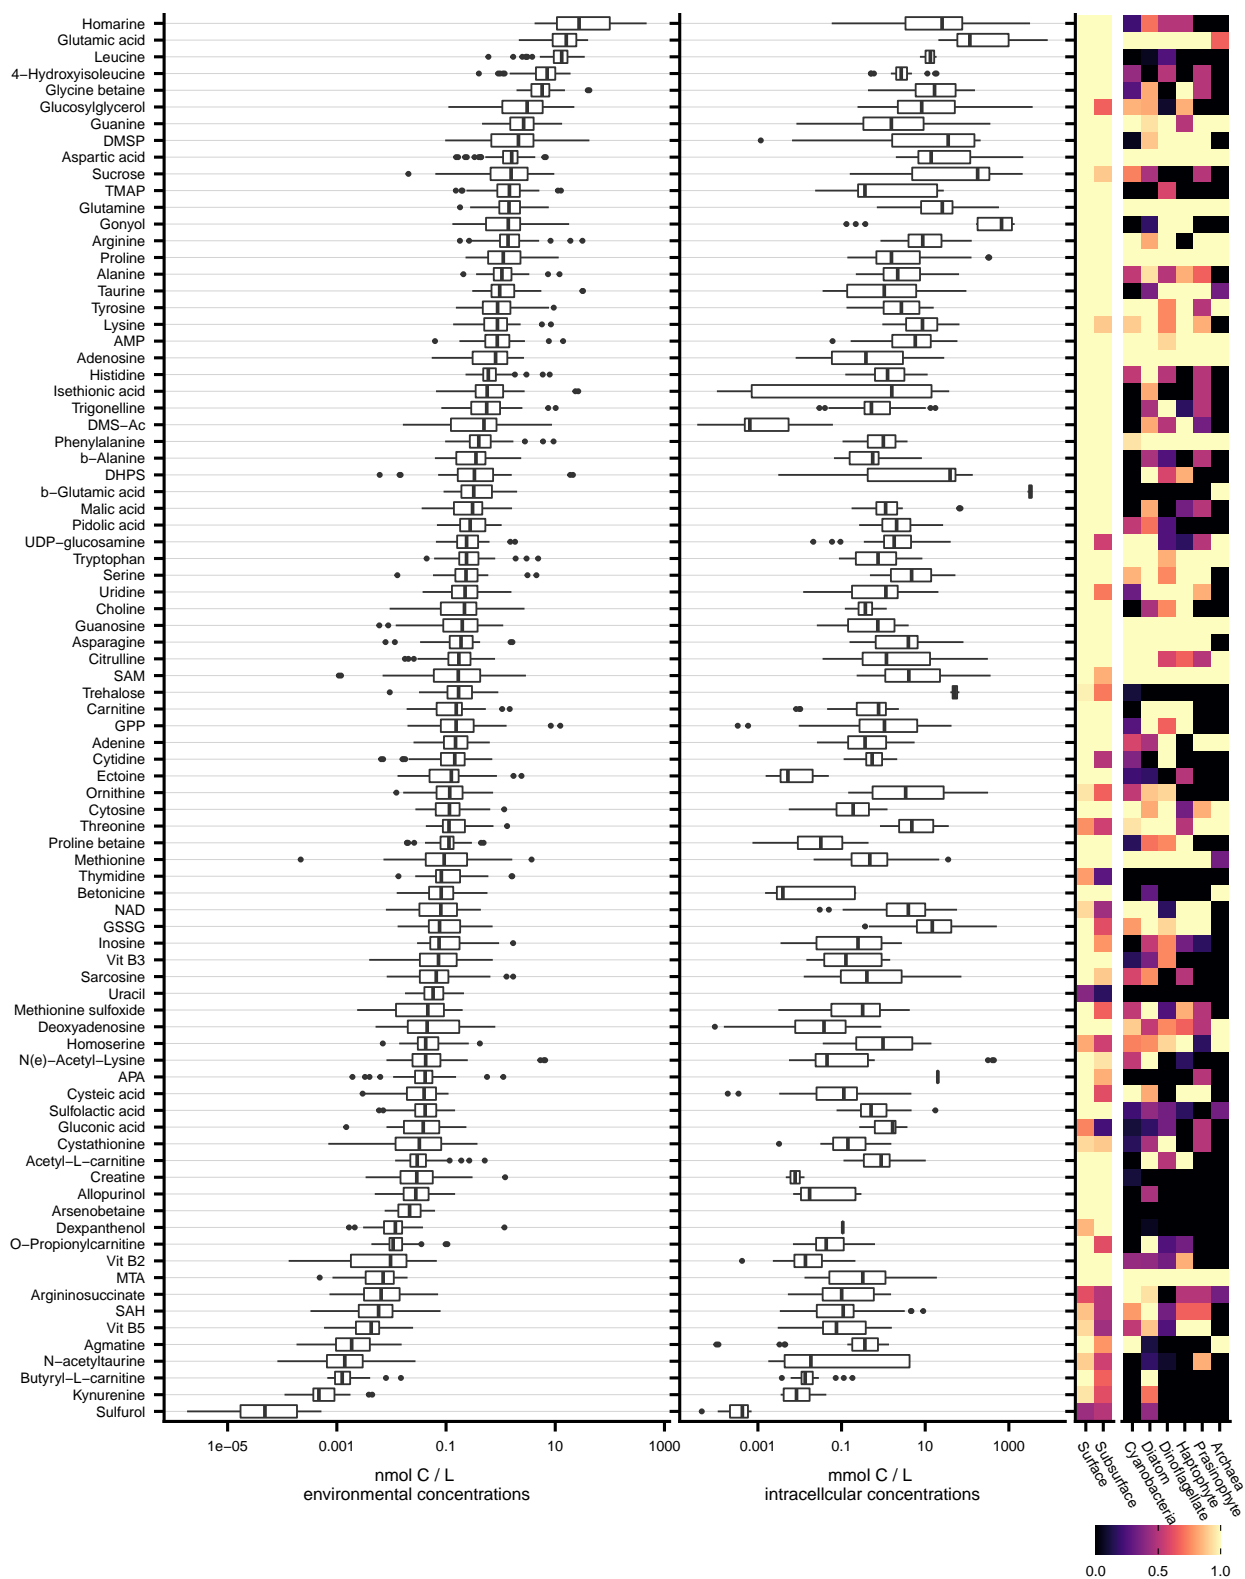

**FIG S9** All identified compounds, with average and standard deviation (box and whiskers, respectively) of concentrations in surface seawater particles or in culture samples (excluding instances where we did not observe the compound). Right tiled panels shows the fraction of samples (environmental samples on the left, culture samples on the right) in which we observed these compounds. Note that x axis is on a log scale. Full results are found in Supplemental Table S10.

Community metabolomics

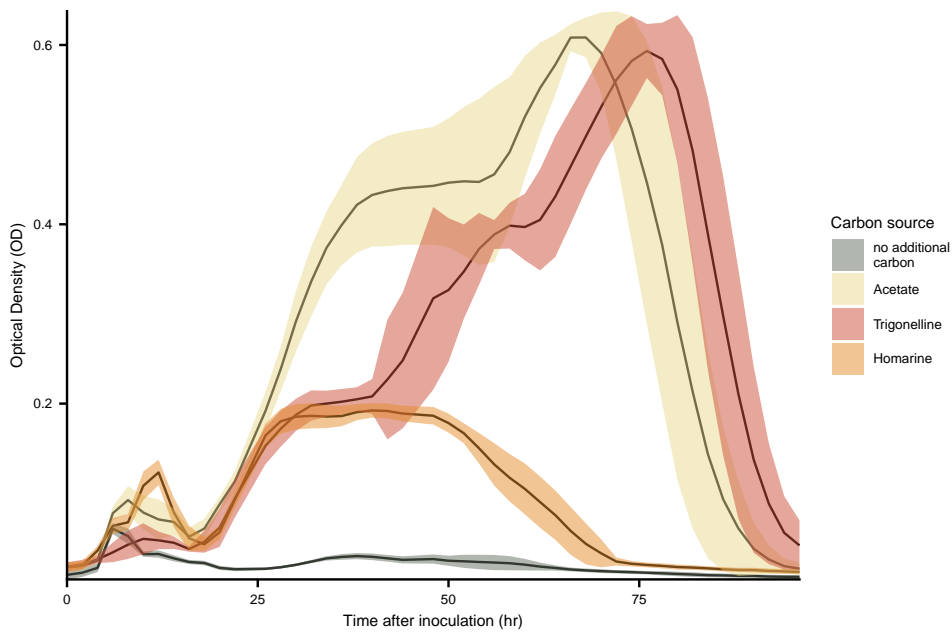

**FIG S10** Growth curves of *Ruegeria pomeroyi* DSS-3 with three different carbon sources: acetate (positive control), homarine, and trigonelline, and no additional carbon (negative control). Note that the initial growth of the negative control is due to carryover of carbon from the inoculum, which had acetate as the carbon source. The same total carbon was added to each treatment.

Heal et al.

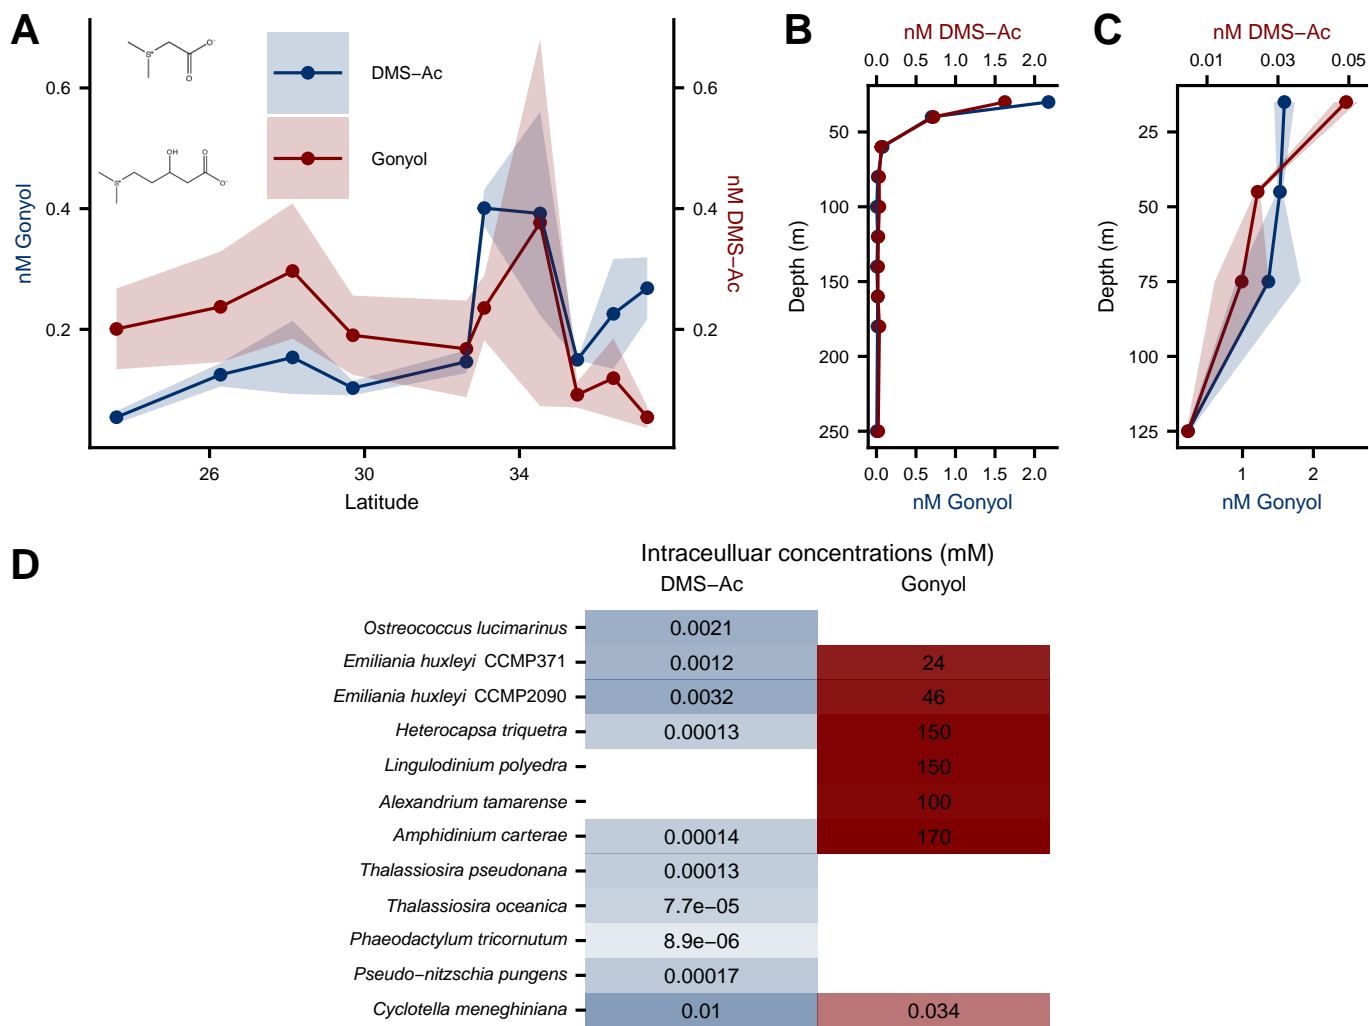

**FIGS11** Gonyol and DMS-Ac spatial patterns in meridional transect (A), NPTZ depth profile (B), NPSG depth profile (C). Intracellular concentrations of gonyol and DMS-Ac in applicable organisms (E). Note the different scales for the compound concentrations (panel C) and depths (between panels B and C).



Community metabolomics

| Cruise ID | Depth (m) | <i>n</i> | Date       | Latitude | Longitude | Vol (L) | Collection method | Environmental regime |
|-----------|-----------|----------|------------|----------|-----------|---------|-------------------|----------------------|
| KM1513    | 15.00     | 3        | 2015-07-31 | 24.55    | -156.33   | 11.00   | niskin            | NPSG                 |
| KM1513    | 45.00     | 3        | 2015-07-31 | 24.55    | -156.33   | 9.00    | niskin            | NPSG                 |
| KM1513    | 75.00     | 3        | 2015-07-31 | 24.55    | -156.33   | 13.00   | niskin            | NPSG                 |
| KM1513    | 125.00    | 3        | 2015-07-31 | 24.55    | -156.33   | 12.00   | niskin            | NPSG                 |
| KOK1606   | 15.00     | 2        | 2016-04-21 | 23.60    | -157.96   | 10.00   | niskin            | NPSG                 |
| KOK1606   | 15.00     | 3        | 2016-05-01 | 26.28    | -158.00   | 10.00   | niskin            | NPSG                 |
| KOK1606   | 15.00     | 5        | 2016-04-22 | 28.14    | -158.00   | 11.00   | niskin            | NPSG                 |
| KOK1606   | 15.00     | 2        | 2016-04-23 | 29.45    | -158.04   | 15.00   | underway          | NPSG                 |
| KOK1606   | 15.00     | 2        | 2016-05-01 | 29.70    | -158.00   | 10.00   | niskin            | NPSG                 |
| KOK1606   | 15.00     | 2        | 2016-04-24 | 30.40    | -157.99   | 15.00   | underway          | NPSG                 |
| KOK1606   | 15.00     | 5        | 2016-04-24 | 32.63    | -158.00   | 11.00   | niskin            | NPTZ                 |
| KOK1606   | 15.00     | 2        | 2016-04-30 | 33.09    | -158.00   | 10.00   | niskin            | NPTZ                 |
| KOK1606   | 15.00     | 2        | 2016-04-25 | 34.53    | -158.00   | 15.00   | underway          | NPTZ                 |
| KOK1606   | 15.00     | 2        | 2016-04-26 | 35.49    | -158.01   | 13.00   | underway          | NPTZ                 |
| KOK1606   | 15.00     | 2        | 2016-04-29 | 36.22    | -158.00   | 10.00   | underway          | NPTZ                 |
| KOK1606   | 15.00     | 2        | 2016-04-29 | 36.30    | -157.99   | 10.00   | underway          | NPTZ                 |
| KOK1606   | 15.00     | 2        | 2016-04-29 | 36.37    | -157.97   | 10.00   | underway          | NPTZ                 |
| KOK1606   | 15.00     | 2        | 2016-04-29 | 36.46    | -157.96   | 10.00   | underway          | NPTZ                 |
| KOK1606   | 15.00     | 2        | 2016-04-29 | 36.57    | -158.00   | 10.00   | niskin            | NPTZ                 |
| KOK1606   | 15.00     | 4        | 2016-04-27 | 36.57    | -158.00   | 11.00   | niskin            | NPTZ                 |
| KOK1606   | 15.00     | 2        | 2016-04-26 | 37.30    | -158.00   | 10.00   | niskin            | NPTZ                 |
| MGL1704   | 30.00     | 1        | 2017-06-03 | 41.42    | -158.00   | 4.00    | niskin            | NPTZ                 |
| MGL1704   | 40.00     | 1        | 2017-06-03 | 41.42    | -158.00   | 4.00    | niskin            | NPTZ                 |
| MGL1704   | 60.00     | 1        | 2017-06-03 | 41.42    | -158.00   | 4.00    | niskin            | NPTZ                 |
| MGL1704   | 80.00     | 1        | 2017-06-03 | 41.42    | -158.00   | 4.00    | niskin            | NPTZ                 |
| MGL1704   | 100.00    | 1        | 2017-06-03 | 41.42    | -158.00   | 4.00    | niskin            | NPTZ                 |
| MGL1704   | 120.00    | 1        | 2017-06-03 | 41.42    | -158.00   | 4.00    | niskin            | NPTZ                 |
| MGL1704   | 140.00    | 1        | 2017-06-03 | 41.42    | -158.00   | 4.00    | niskin            | NPTZ                 |
| MGL1704   | 160.00    | 1        | 2017-06-03 | 41.42    | -158.00   | 4.00    | niskin            | NPTZ                 |
| MGL1704   | 180.00    | 1        | 2017-06-03 | 41.42    | -158.00   | 4.00    | niskin            | NPTZ                 |
| MGL1704   | 250.00    | 1        | 2017-06-03 | 41.42    | -158.00   | 4.00    | niskin            | NPTZ                 |

**TABLE S1** Summary of samples collected and analyzed in this study.

| Region | Latitude (°N) | SST (°C)  | SSS       | N+N (μM)  | PO <sub>4</sub> (μM) | Chl (mg m <sup>-3</sup> ) |
|--------|---------------|-----------|-----------|-----------|----------------------|---------------------------|
| NPSG   | 23.54–29.7    | 19.8–24   | 35.1–35.3 | dl-0.002  | 0.02–0.05            | 0.01–0.11                 |
| NPTZ   | 32.63–37.3    | 11.4–17.1 | 34.1–34.7 | 0.06–5.87 | 0.07–0.51            | 0.16–0.37                 |

**TABLE S2** Summary of physical and chemical parameters on April 2016 cruise. Reprinted with permission from (27).

Heal et al.

| Broad taxon    | Species                          | Strain | <i>n</i> | Short ID |
|----------------|----------------------------------|--------|----------|----------|
| Archaea        | <i>Nitrosopumilus maritimus</i>  | SCM1   | 3        | Nmar     |
| Cyanobacteria  | <i>Crocospaera watsonii</i>      | 8501   | 3        | 8501     |
| Cyanobacteria  | <i>Prochlorococcus marinus</i>   | 1314   | 3        | 1314P    |
| Cyanobacteria  | <i>Prochlorococcus marinus</i>   | AS9601 | 3        | As9601   |
| Cyanobacteria  | <i>Prochlorococcus marinus</i>   | MED4   | 3        | MED4     |
| Cyanobacteria  | <i>Prochlorococcus marinus</i>   | NATL2A | 3        | Nat      |
| Cyanobacteria  | <i>Synechococcus sp.</i>         | 7803   | 2        | 7803     |
| Cyanobacteria  | <i>Synechococcus sp.</i>         | 8102   | 2        | 8102     |
| Diatom         | <i>Cyclotella meneghiniana</i>   | 338    | 3        | Cy       |
| Diatom         | <i>Navicula pelliculosa</i>      | 543    | 3        | Np       |
| Diatom         | <i>Phaeodactylum tricornutum</i> | 2561   | 2        | Pt       |
| Diatom         | <i>Pseudo-nitzschia pungens</i>  | Pc55x  | 3        | Pc55x    |
| Diatom         | <i>Thalassiosira oceanica</i>    | 1005   | 3        | To       |
| Diatom         | <i>Thalassiosira pseudonana</i>  | 1335   | 3        | Tp       |
| Dinoflagellate | <i>Alexandrium tamarense</i>     | 1771   | 3        | 1771     |
| Dinoflagellate | <i>Amphidinium carterae</i>      | 1314   | 3        | 1314     |
| Dinoflagellate | <i>Heterocapsa triquetra</i>     | 449    | 3        | 449      |
| Dinoflagellate | <i>Lingulodinium polyedra</i>    | 2021   | 3        | 2021     |
| Haptophyte     | <i>Emiliana huxleyi</i>          | 2090   | 3        | 2090     |
| Haptophyte     | <i>Emiliana huxleyi</i>          | 371    | 3        | 371      |
| Prasinophyte   | <i>Micromonas pusilla</i>        | 1545   | 3        | 1545     |
| Prasinophyte   | <i>Ostreococcus lucimarinus</i>  | 3430   | 3        | 3430     |

**TABLE S3** Summary of cultured organisms analyzed in this study. More information (including culturing conditions for all except the Archaea) can be found in (5). Cyanobacteria and archaea were obtained from individual lab culture collections and eukaryotic phytoplankton were obtained from the NCMA culture collection. More detailed information are in Table S7. Short ID is how the organism is labeled throughout the figures.
